# Supplementary material for: Comparative Genomics of Gardnerella vaginalis Strains Reveals Substantial Differences in Metabolic and Virulence Potential
Source: PubMed Central journal article supplement (PMC2928729; doi:10.1371/journal.pone.0012411), 2010-08-26
Supplement: pone.0012411.s003.pdf [file pone.0012411.s003.pdf]

Number of Orthologues

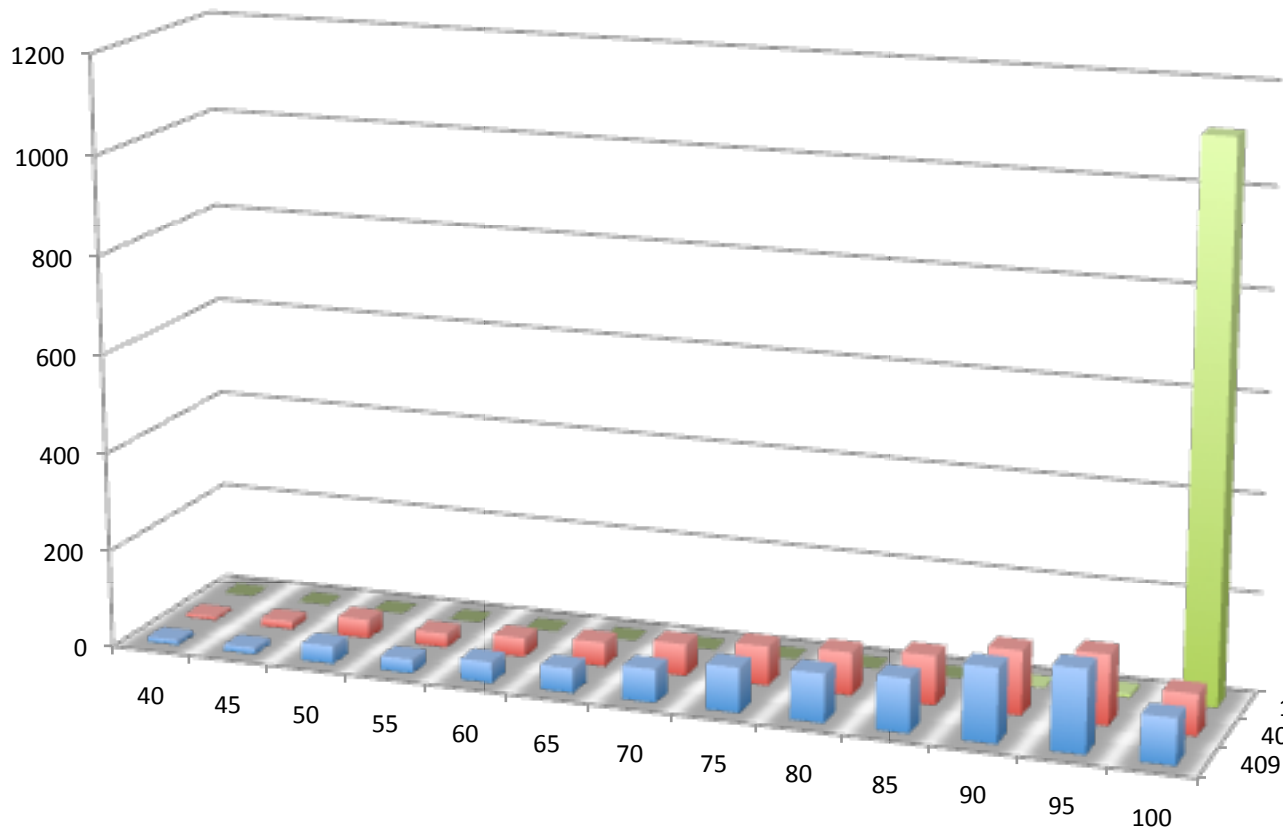

Percent Amino acid Identity

14019 v 14018  
409 vs 14018  
409 v 14019
