# Supplementary material for: Comparative Genomics of Gardnerella vaginalis Strains Reveals Substantial Differences in Metabolic and Virulence Potential
Source: PubMed Central journal article supplement (PMC2928729; doi:10.1371/journal.pone.0012411), 2010-08-26
Supplement: pone.0012411.s005.pdf [file pone.0012411.s005.pdf]

**Table S1      Transfer RNAs**

| tRNA #               | tRNA gene |         | tRNA Type | Anti-codon | Score |
|----------------------|-----------|---------|-----------|------------|-------|
|                      | 5'        | 3'      |           |            |       |
| <b>Strain 409-05</b> |           |         |           |            |       |
| 1                    | 171779    | 171851  | Glu       | CTC        | 55.69 |
| 2                    | 171892    | 171963  | Gln       | CTG        | 53.54 |
| 3                    | 211065    | 211146  | Tyr       | GTA        | 55    |
| 4                    | 211148    | 211219  | Thr       | GGT        | 76.61 |
| 5                    | 211224    | 211297  | Met       | CAT        | 76.14 |
| 6                    | 217794    | 217880  | Ser       | GCT        | 55.55 |
| 7                    | 246925    | 247010  | Ser       | CGA        | 59.44 |
| 8                    | 333029    | 333113  | Ser       | TGA        | 60.04 |
| 9                    | 390038    | 390110  | Arg       | CCG        | 79.79 |
| 10                   | 415423    | 415496  | Lys       | CTT        | 80.83 |
| 11                   | 417445    | 417517  | Arg       | CCT        | 72.01 |
| 12                   | 449517    | 449588  | Glu       | TTC        | 61.7  |
| 13                   | 450680    | 450753  | Met       | CAT        | 78.92 |
| 14                   | 613221    | 613294  | Leu       | CAA        | 47.58 |
| 15                   | 635799    | 635872  | Pro       | TGG        | 80.32 |
| 16                   | 698358    | 698441  | Leu       | TAA        | 63.31 |
| 17                   | 817174    | 817246  | Gly       | GCC        | 78.04 |
| 18                   | 817275    | 817345  | Cys       | GCA        | 58.48 |
| 19                   | 817376    | 817447  | Val       | GAC        | 73    |
| 20                   | 817487    | 817559  | Val       | CAC        | 73.61 |
| 21                   | 824252    | 824324  | Gly       | GCC        | 78.04 |
| 22                   | 1040814   | 1040886 | Asn       | GTT        | 77.03 |
| 23                   | 1577923   | 1577850 | Ile       | GAT        | 82.64 |
| 24                   | 1577822   | 1577750 | Ala       | TGC        | 77.73 |
| 25                   | 1571783   | 1571713 | Gly       | CCC        | 63.69 |
| 26                   | 1550956   | 1550874 | Leu       | CAG        | 64.29 |
| 27                   | 1394976   | 1394904 | Trp       | CCA        | 75.48 |
| 28                   | 1347693   | 1347623 | Gly       | TCC        | 67.73 |
| 29                   | 1327654   | 1327570 | Ser       | GGA        | 61.18 |
| 30                   | 1235848   | 1235775 | Asp       | GTC        | 74.49 |
| 31                   | 1235731   | 1235659 | Phe       | GAA        | 76.24 |
| 32                   | 1129695   | 1129623 | Arg       | TCT        | 63.05 |
| 33                   | 1110480   | 1110408 | His       | GTG        | 69.95 |
| 34                   | 1091045   | 1090975 | Gln       | TTG        | 56.43 |
| 35                   | 1083434   | 1083362 | Ala       | GGC        | 70.28 |
| 36                   | 942939    | 942866  | Arg       | ACG        | 71.14 |
| 37                   | 653340    | 653253  | Leu       | GAG        | 57.71 |
| 38                   | 438697    | 438624  | Val       | TAC        | 77.34 |
| 39                   | 368464    | 368391  | Pro       | CGG        | 77.42 |
| 40                   | 314848    | 314776  | Thr       | CGT        | 71.28 |
| 41                   | 314705    | 314625  | Leu       | TAG        | 66.62 |
| 42                   | 179875    | 179803  | Ala       | CGC        | 73.79 |
| 43                   | 108826    | 108753  | Met       | CAT        | 68.66 |
| 44                   | 29836     | 29764   | Lys       | TTT        | 72.01 |
| 45                   | 22414     | 22341   | Thr       | TGT        | 73.3  |
| <b>Strain 317</b>    |           |         |           |            |       |
| 1                    | 40633     | 40706   | Ile       | GAT        | 82.64 |
| 2                    | 40739     | 40811   | Ala       | TGC        | 77.73 |
| 3                    | 46475     | 46545   | Gly       | CCC        | 64.76 |
| 4                    | 253752    | 253824  | Trp       | CCA        | 75.48 |
| 5                    | 375812    | 375885  | Asp       | GTC        | 74.49 |
| 6                    | 375929    | 376001  | Phe       | GAA        | 76.24 |
| 7                    | 377142    | 377213  | Glu       | TTC        | 61.7  |
| 8                    | 452894    | 452966  | Arg       | CCT        | 72.01 |
| 9                    | 562308    | 562381  | Pro       | TGG        | 80.32 |
| 10                   | 654287    | 654360  | Arg       | ACG        | 71.14 |
| 11                   | 697013    | 697085  | Gly       | GCC        | 78.04 |
| 12                   | 697114    | 697184  | Cys       | GCA        | 58.48 |
| 13                   | 697216    | 697287  | Val       | GAC        | 73    |
| 14                   | 697328    | 697400  | Val       | CAC        | 73.61 |
| 15                   | 750911    | 750994  | Leu       | TAA        | 64.71 |
| 16                   | 1054968   | 1055041 | Leu       | CAA        | 47.58 |
| 17                   | 1281398   | 1281471 | Met       | CAT        | 78.79 |
| 18                   | 1338700   | 1338784 | Ser       | GGA        | 61.18 |
| 19                   | 1350902   | 1350974 | Thr       | CGT        | 79.23 |
| 20                   | 1351012   | 1351092 | Leu       | TAG        | 65.43 |
| 21                   | 1533597   | 1533670 | Met       | CAT        | 68.66 |
| 22                   | 1627129   | 1627201 | Lys       | TTT        | 72.01 |
| 23                   | 1643652   | 1643725 | Thr       | TGT        | 73.38 |
| 24                   | 1461681   | 1461609 | Glu       | CTC        | 52.82 |
| 25                   | 1461568   | 1461497 | Gln       | CTG        | 53.54 |
| 26                   | 1451459   | 1451378 | Tyr       | GTA        | 56.67 |
| 27                   | 1451376   | 1451305 | Thr       | GGT        | 76.61 |
| 28                   | 1451300   | 1451227 | Met       | CAT        | 76.14 |
| 29                   | 1444807   | 1444721 | Ser       | GCT        | 55.77 |
| 30                   | 1414785   | 1414700 | Ser       | CGA        | 60.18 |
| 31                   | 1353334   | 1353264 | Gly       | TCC        | 73.56 |
| 32                   | 1187735   | 1187651 | Ser       | TGA        | 60.04 |
| 33                   | 1054718   | 1054646 | Arg       | TCT        | 66.71 |
| 34                   | 1046866   | 1046794 | Ala       | GGC        | 70.28 |
| 35                   | 922529    | 922457  | His       | GTG        | 71.46 |
| 36                   | 910009    | 909939  | Gln       | TTG        | 56.43 |
| 37                   | 886369    | 886297  | Gly       | GCC        | 78.04 |
| 38                   | 756350    | 756278  | Asn       | GTT        | 77.03 |
| 39                   | 552886    | 552800  | Leu       | GAG        | 58.92 |
| 40                   | 540099    | 540027  | Arg       | CCG        | 79.26 |
| 41                   | 520559    | 520486  | Pro       | CGG        | 70.17 |
| 42                   | 481247    | 481174  | Val       | TAC        | 77.34 |
| 43                   | 444467    | 444394  | Lys       | CTT        | 80.83 |
| 44                   | 260852    | 260780  | Ala       | CGC        | 73.79 |
| 45                   | 71049     | 70967   | Leu       | CAG        | 63.45 |

| Strain 594 |         |         |     |     |       |
|------------|---------|---------|-----|-----|-------|
| 1          | 2700    | 2785    | Ser | CGA | 60.18 |
| 2          | 44974   | 45044   | Gly | CCC | 64.76 |
| 3          | 283294  | 283367  | Val | TAC | 77.34 |
| 4          | 617904  | 617987  | Leu | TAA | 64.71 |
| 5          | 725612  | 725685  | Arg | ACG | 71.14 |
| 6          | 896495  | 896565  | Gly | TCC | 73.56 |
| 7          | 1102134 | 1102216 | Leu | CAG | 63.45 |
| 8          | 1223157 | 1223229 | Arg | CCT | 72.01 |
| 9          | 1326280 | 1326350 | Gln | TTG | 56.43 |
| 10         | 1348064 | 1348136 | Gly | GCC | 78.04 |
| 11         | 1426521 | 1426594 | Pro | TGG | 80.32 |
| 12         | 1577854 | 1577938 | Ser | TGA | 60.04 |
| 13         | 1505463 | 1505391 | Arg | CCG | 79.26 |
| 14         | 1485923 | 1485850 | Pro | CGG | 70.17 |
| 15         | 1417099 | 1417013 | Leu | GAG | 58.92 |
| 16         | 1253588 | 1253516 | Glu | CTC | 52.82 |
| 17         | 1253475 | 1253404 | Gln | CTG | 53.54 |
| 18         | 1243366 | 1243285 | Tyr | GTA | 56.67 |
| 19         | 1243283 | 1243212 | Thr | GGT | 76.61 |
| 20         | 1243207 | 1243134 | Met | CAT | 76.14 |
| 21         | 1214731 | 1214658 | Lys | CTT | 80.83 |
| 22         | 1003419 | 1003347 | Ala | CGC | 73.79 |
| 23         | 911129  | 911045  | Ser | GGA | 61.18 |
| 24         | 898927  | 898855  | Thr | CGT | 79.23 |
| 25         | 898817  | 898737  | Leu | TAG | 65.43 |
| 26         | 885573  | 885500  | Asp | GTC | 74.49 |
| 27         | 885456  | 885384  | Phe | GAA | 76.24 |
| 28         | 884243  | 884172  | Glu | TTC | 61.7  |
| 29         | 807731  | 807659  | His | GTG | 71.46 |
| 30         | 764685  | 764613  | Lys | TTT | 72.01 |
| 31         | 694498  | 694426  | Ala | GGC | 70.28 |
| 32         | 623343  | 623271  | Asn | GTT | 77.03 |
| 33         | 406647  | 406574  | Thr | TGT | 73.38 |
| 34         | 247357  | 247284  | Met | CAT | 78.79 |
