# Supplementary material for: Comparative Genomics of Gardnerella vaginalis Strains Reveals Substantial Differences in Metabolic and Virulence Potential
Source: PubMed Central journal article supplement (PMC2928729; doi:10.1371/journal.pone.0012411), 2010-08-26
Supplement: pone.0012411.s006.pdf [file pone.0012411.s006.pdf]

**Table S2 Genes involved in competence**

| Locus tag       |                  |     | Product                        | Orthology (% ID)<br>a-b / b-c / c-a |
|-----------------|------------------|-----|--------------------------------|-------------------------------------|
| 409-05          | 317              | 594 |                                |                                     |
| HMPREF0424_0942 | HMPREF0421_20735 | 816 | Competence protein, ComEC      | 42 / 100 / 49                       |
| HMPREF0424_0943 | n/a              | n/a | Competence protein, ComEA      | - / - / -                           |
| n/a             | HMPREF0421_20734 | 815 | Competence protein, ComEA      | - / 100 / -                         |
| HMPREF0424_1021 | HMPREF0421_20866 | 122 | RecA                           | 92 / 100 / 92                       |
| HMPREF0424_1022 | HMPREF0421_20868 | 124 | CinA-family competence protein | 48 / 100 / 48                       |

n/a – Orthologue was not identified within the genome
