# Supplementary material for: Comparative Genomics of Gardnerella vaginalis Strains Reveals Substantial Differences in Metabolic and Virulence Potential
Source: PubMed Central journal article supplement (PMC2928729; doi:10.1371/journal.pone.0012411), 2010-08-26
Supplement: pone.0012411.s009.pdf [file pone.0012411.s009.pdf]

**Table S5 Nitrogen Metabolism Genes**

| Locus Tag                          |         |         | Enzyme                                                 | Orthology (% ID)<br>a-b / b-c / c-a |
|------------------------------------|---------|---------|--------------------------------------------------------|-------------------------------------|
| 409-05 (a)                         | 317 (b) | 594 (c) |                                                        |                                     |
| <b>Ammonia utilization</b>         |         |         |                                                        |                                     |
| HMPREF0424_0073                    | 86      | 97      | Amt-family ammonia transporter                         | 72 / 100 / 72                       |
| HMPREF0424_0474                    | n/a     | n/a     | Asp-synthase (glutamine-hydrolyzing)                   | - / - / -                           |
| HMPREF0424_0930                    | 726     | 1147    | Glutamate-ammonia ligase                               | 78 / 100 / 78                       |
| <b>Amino acid utilization</b>      |         |         |                                                        |                                     |
| HMPREF0424_0111                    | n/a     | n/a     | Aspartate transaminase                                 | - / - / -                           |
| HMPREF0424_1220                    | 312     | n/a     | Aspartate transaminase                                 | 85 / - / -                          |
| HMPREF0424_0134                    | 27      | 440     | Amino acid permease                                    | 87 / / 87                           |
| HMPREF0424_0241                    | 1255    | n/a     | Amino acid permease                                    | 92 / - / -                          |
| HMPREF0424_0196                    | 1274    | 497     | LIVCS-family branched chain amino acid symporter       | 92 / 100 / 92                       |
| HMPREF0424_0235                    | 1258    | n/a     | Histidinol phosphate transaminase                      | 83 / - / -                          |
| HMPREF0424_0547                    | 1001    | 880     | DAACS-family dicarboxylate/amino acid:sodium symporter | 95 / 100 / 95                       |
| HMPREF0424_0786                    | n/a     | n/a     | Glutamine-specific ABC-transport system                | - / - / -                           |
| HMPREF0424_0787                    | 802     | n/a     |                                                        | 87 / - / -                          |
| HMPREF0424_0788                    | 801     | n/a     |                                                        | 90 / - / -                          |
| HMPREF0424_0789                    | 800     | n/a     |                                                        | 87 / - / -                          |
| HMPREF0424_0858                    | 703     | 805     | Branched chain amino acid transaminase                 | 96 / 100 / 96                       |
| n/a                                | 366     | 1159    | Amino acid-specific ABC transporter                    | - / 100 / -                         |
| n/a                                | 365     | 1158    |                                                        | - / 100 / -                         |
| n/a                                | 364     | 1157    |                                                        | - / 100 / -                         |
| HMPREF0424_0954                    | 705     | n/a     | Lysine-specific permease                               | 86 / - / -                          |
| <b>Protein/Peptide utilization</b> |         |         |                                                        |                                     |
| HMPREF0424_0092                    | 69      | n/a     | Clp-family ATP-dependent endopeptidase                 | 99 / - / -                          |
| HMPREF0424_0878                    | n/a     | n/a     | Clp-family ATP-dependent endopeptidase                 | - / - / -                           |
| HMPREF0424_0879                    | 622     | 61      | Clp-family ATP-dependent endopeptidase                 | 93 / 100 / 93                       |
| HMPREF0424_0302                    | 380     | 522     | Oligopeptidase                                         | 64 / 100 / 64                       |
| HMPREF0424_0436                    | 471     | n/a     | Dipeptide-specific ABC transporter                     | 68 / - / -                          |
| HMPREF0424_0437                    | 472     | n/a     |                                                        | 69 / - / -                          |
| HMPREF0424_0438                    | 473     | n/a     |                                                        | 71 / - / -                          |
| HMPREF0424_0439                    | n/a     | n/a     |                                                        | - / - / -                           |
| HMPREF0424_1149                    | 1148    | 1048    | Membrane-bound alanyl aminopeptidase                   | 95 / 100 / 95                       |
| HMPREF0424_0563                    | 976     | n/a     | C15-family pyrrolidone-carboxylate peptidase           | 95 / - / -                          |
| n/a                                | 325     | 281     | C15-family pyrrolidone-carboxylate peptidase           | - / 100 / -                         |
| n/a                                | n/a     | 983     | C15-family pyrrolidone-carboxylate peptidase           | - / - / -                           |
| HMPREF0424_1262                    | 261     | 115     | C69-family dipeptidase                                 | 95 / 100 / 95                       |
| n/a                                | n/a     | 56      | M13-family peptidase                                   | - / - / -                           |
| HMPREF0424_0408                    | 536     | 692     | M20-family peptidase                                   | 89 / 100 / 89                       |
| HMPREF0424_0463                    | 1147    | 1049    | M24-family peptidase                                   | 89 / 99 / 88                        |
| HMPREF0424_0007                    | 154     | 876     | M48-family peptidase                                   | 53 / 100 / 53                       |
| HMPREF0424_1074                    | 905     | n/a     | Methionine aminopeptidase                              | 100 / - / -                         |
| HMPREF0424_0447                    | 482     | 479     | S16-family peptidase                                   | 56 / 100 / 56                       |
| HMPREF0424_0025                    | 139     | 1071    | S54-family peptidase                                   | 65 / 100 / 65                       |
| HMPREF0424_0423                    | 466     | n/a     | Cell wall-associated serine proteinase                 | 42 / - / -                          |
| n/a                                | n/a     | 464     | Cell wall-associated serine proteinase                 | - / - / -                           |
