# Supplementary material for: Comparative Genomics of Gardnerella vaginalis Strains Reveals Substantial Differences in Metabolic and Virulence Potential
Source: PubMed Central journal article supplement (PMC2928729; doi:10.1371/journal.pone.0012411), 2010-08-26
Supplement: pone.0012411.s010.pdf [file pone.0012411.s010.pdf]

**Table S6 Strain variable enzymes**

| Process                                     | EC Number               | Functions                                                                                                                |
|---------------------------------------------|-------------------------|--------------------------------------------------------------------------------------------------------------------------|
| <b>409-05 only<sup>1</sup></b>              |                         |                                                                                                                          |
| Amino acid metabolism                       | 2.3.1.46                | Homoserine O-succinyltransferase (HMPREF0424_0141)                                                                       |
|                                             | 2.5.1.49                | O-acetylhomoserine aminocarboxypropyltransferase (HMPREF0424_0640)                                                       |
|                                             | 4.2.1.20                | Tryptophan synthase, beta subunit (HMPREF0424_1349)                                                                      |
|                                             | 5.1.1.13                | Aspartate racemase (HMPREF0424_0465)                                                                                     |
| Amino acid metabolism / Nitrogen metabolism | 6.3.5.4                 | Asparagine synthase (glutamine-hydrolyzing) (HMPREF0424_0474)                                                            |
| Folate biosynthesis                         | 2.5.1.15                | Dihydropteroate synthase (HMPREF0424_0665)                                                                               |
|                                             | 2.7.6.3                 | 2-amino-4-hydroxy-6-hydroxymethylidihydropteridine diphosphokinase (HMPREF0424_0619)                                     |
| PTS transport                               | 2.7.3.9                 | Phosphoenolpyruvate phosphotransferase system enzyme I (HMPREF0424_1268)                                                 |
| Nucleic acid metabolism                     | 3.1.21.-                | LlaJI-family restriction endonuclease (HMPREF0424_0537)                                                                  |
|                                             | 3.5.2.5                 | Allantoinase (HMPREF0424_0775)                                                                                           |
|                                             | 3.5.3.9                 | Allantoate amidohydrolase (HMPREF0424_0773)                                                                              |
|                                             | 3.5.4.-                 | Cytidine/deoxycytidylate deaminase (HMPREF0424_0498)                                                                     |
| Glycosylase                                 | 3.2.2.24                | ADP-ribosylglycohydrolase (HMPREF0424_0289)                                                                              |
| <b>317 only<sup>1</sup></b>                 |                         |                                                                                                                          |
| Protein regulation                          | 2.7.11.-                | Serine/threonine protein kinase (HMPREF0421_20141)                                                                       |
| Nucleic acid metabolism                     | 3.1.4.-                 | Rne/Rng family ribonuclease (HMPREF0421_20320)                                                                           |
| Glycan degradation                          | 3.2.1.18                | Sialidase (HMPREF0421_20186)                                                                                             |
| Toluene and xylene degradation              | 5.1.2.2                 | Mandelate racemase/muconate lactonizing enzyme C-terminal domain protein (HMPREF0421_20695)                              |
| Glycolysis / Gluconeogenesis                | 5.1.3.3                 | Aldose 1-epimerase (HMPREF0421_21170)                                                                                    |
| <b>594 only</b>                             |                         |                                                                                                                          |
| Aminosugar metabolism                       | 2.7.7.23                | N-acetylglucosamine diphosphorylase (ORF 865)                                                                            |
| Glycogen/starch metabolism                  | 5.4.99.16               | Trehalose synthase (ORF 883)                                                                                             |
| Nucleic acid metabolism                     | 5.99.1.-                | Topoisomerase IV subunit B (ORF 1053)                                                                                    |
| <b>409-05 and 317<sup>1</sup></b>           |                         |                                                                                                                          |
| Lipid metabolism                            | 2.3.1.157               | UDP-N-acetylglucosamine diphosphorylase/glucosamine-1-phosphate N-acetyltransferase (HMPREF0424_1013 & HMPREF0421_20975) |
| Fatty acid biosynthesis                     | 2.3.1.85                | Fatty acid synthase (HMPREF0424_1197 & HMPREF0421_21228)                                                                 |
| Amino acid metabolism                       | 2.6.1.1                 | Aspartate transaminase (HMPREF0424_1220 & HMPREF0421_20325)                                                              |
| Amino acid metabolism / Drug metabolism     | 2.4.2.3                 | Pnp/Udp-family phosphorylase (HMPREF0424_0551 & HMPREF0421_21030)                                                        |
| Nicotinate & Nicotinamide metabolism        | 2.7.1.23                | NAD(+)/NADH kinase (HMPREF0424_0680 & HMPREF0421_20594)                                                                  |
| Vitamin metabolism                          | 3.6.1.9                 | Type I phosphodiesterase/nucleotide pyrophosphatase (HMPREF0424_0700 & HMPREF0421_20620)                                 |
| Protein modification                        | 3.4.24.71               | Endothelin-converting enzyme (HMPREF0424_1076 & HMPREF0421_20934)                                                        |
| Amino acid metabolism                       | 3.5.1.4                 | Amidohydrolase (HMPREF0424_0452 & HMPREF0421_20509)                                                                      |
| Lipid metabolism                            | 3.1.1.3                 | Triacylglycerol lipase (HMPREF0424_0004 & HMPREF0421_20172)                                                              |
| Glycolysis / Gluconeogenesis                | 4.1.2.13                | Fructose-bisphosphate aldolase class II (HMPREF0424_0114 & HMPREF0421_20056)                                             |
|                                             | 4.2.1.11                | Enolase (HMPREF0424_0662 & HMPREF0421_20718)                                                                             |
| <b>317 and 594</b>                          |                         |                                                                                                                          |
| Amino acid metabolism                       | 2.3.1.3                 | Serine acetyltransferase (HMPREF0421_21032 & ORF 878)                                                                    |
|                                             | 2.7.2.4                 | Aspartate kinase (HMPREF0421_20041 & ORF 446)                                                                            |
|                                             | 2.7.2.4                 | Aspartate kinase (HMPREF0421_20042 & ORF 447)                                                                            |
|                                             | 3.3.1.1                 | S-adenosyl-L-homocysteine hydrolase (HMPREF0421_20382 & ORF 512)                                                         |
|                                             | 3.5.99.2                | TENA/THI-4 protein (HMPREF0421_21010 & ORF 986)                                                                          |
|                                             | 4.2.1.52                | Dihydrodipicolinate synthase (HMPREF0421_20180 & ORF 1097)                                                               |
|                                             | 4.2.1.52                | Dihydrodipicolinate synthase (HMPREF0421_20691 & ORF 1012)                                                               |
|                                             | Carbohydrate metabolism | 3.2.1.135                                                                                                                |
| 3.2.1.2                                     |                         | Glycoside hydrolase family 31 (HMPREF0421_20452 & ORF 423)                                                               |
| 5.1.3.13                                    |                         | Fused dTDP-4-keto-L-rhamnose reductase and dTDP-4-keto-6-deoxyglucose-3,5-epimerase enzyme (HMPREF0421_20400 & ORF 530)  |
| 2.4.1.230                                   |                         | Kojibiose phosphorylase (HMPREF0421_21250 & ORF 1088)                                                                    |
| 5.1.3.4                                     |                         | L-Ribulose-5-phosphate 4-epimerase (HMPREF0421_20373 & ORF 1154)                                                         |
| 5.3.1.4                                     |                         | L-Arabinose isomerase (HMPREF0421_20374 & ORF 1155)                                                                      |
| 2.7.1.6                                     |                         | Galactokinase (HMPREF0421_21182 & ORF 1193)                                                                              |
| 3.2.1.23                                    |                         | Beta-galactosidase (HMPREF0421_20100 & ORF 1134)                                                                         |
| 3.2.1.23                                    |                         | Beta-galactosidase (HMPREF0421_21246 & ORF 1092)                                                                         |
| 2.7.1.2                                     |                         | Glucokinase (HMPREF0421_20174 & ORF 900)                                                                                 |
| 2.7.1.2                                     |                         | Glucokinase (HMPREF0421_20897 & ORF 830)                                                                                 |
| Glycan degradation                          | 3.2.1.51                | $\alpha$ -L-fucosidase (HMPREF0421_20101 & ORF 1135)                                                                     |
| Glycogen/starch metabolism                  | 5.4.2.6                 | $\beta$ -phosphoglucomutase (HMPREF0421_21248 & ORF 1090)                                                                |
| N-acetylglucosamine metabolism              | 3.5.1.25                | N-acetylglucosamine-6-phosphate deacetylase (HMPREF0421_20182 & ORF 1099)                                                |
|                                             | 3.5.99.6                | Glucosamine-6-phosphate deaminase (HMPREF0421_20181 & ORF 1098)                                                          |
|                                             | 5.1.3.8                 | N-acyl-D-glucosamine 2-epimerase (HMPREF0421_20908 & ORF 1042)                                                           |
|                                             | 5.1.3.9                 | N-acylglucosamine-6-phosphate 2-epimerase (HMPREF0421_20175 & ORF 899)                                                   |
| Xylose metabolism                           | 2.7.1.16                | Ribulokinase (HMPREF0421_20372 & ORF 1153)                                                                               |
| Pentose phosphate pathway                   | 2.7.1.12                | Gluconokinase (HMPREF0421_20297 & ORF 1005)                                                                              |
| Nucleic acid metabolism                     | 3.5.4.28                | S-adenosylhomocysteine deaminase (HMPREF0421_20381 & ORF 511)                                                            |
| Ascorbate biosynthesis                      | 1.1.1.274               | 2,5-didehydrogluconate reductase (HMPREF0421_20375 & ORF 1156)                                                           |
| Nicotinate & Nicotinamide metabolism        | 2.7.7.1                 | Galactose-1-phosphate uridylyltransferase (HMPREF0421_21097 & ORF 765)                                                   |
|                                             | 2.7.7.1                 | Galactose-1-phosphate uridylyltransferase (HMPREF0421_21183 & ORF 93)                                                    |
| Protein modification                        | 2.7.1.95                | Aminoglycoside phosphotransferase (HMPREF0421_20507 & ORF 1079)                                                          |
| Bile acid metabolism                        | 3.5.1.24                | Choloylglycine hydrolase (HMPREF0421_21234 & ORF 145)                                                                    |
| Glyoxylate & dicarboxylate metabolism       | 1.1.1.77                | Lactaldehyde reductase (HMPREF0421_20697 & ORF 18)                                                                       |
| Terpenoid biosynthesis                      | 2.5.1.-                 | 1,4-dihydroxy-2-naphthoate octaprenyltransferase (HMPREF0421_20560 & ORF 622)                                            |
|                                             | 2.7.7.24                | Glucose-1-phosphate thymidyltransferase (HMPREF0421_20399 & ORF 529)                                                     |

<sup>1</sup> These enzymes may also be present in the missing segments of the strain 594 genome. Enzymes with ambiguous EC numbers are not reported
