# Supplementary material for: Comparative Genomics of Gardnerella vaginalis Strains Reveals Substantial Differences in Metabolic and Virulence Potential
Source: PLoS One. 2010 Aug 26;5(8):e12411. doi: 10.1371/journal.pone.0012411 (PMC2928729; doi:10.1371/journal.pone.0012411)
Supplement: Table S3 — G. vaginalis genes lacking orthologues in Bifidobacteria. These genes had no apparent orthologue in the completed genomes of Bifidobacterium adolescentis ATCC15703, B. dentium BD1, B. longum NCC2705 or in the draft genomes of B. breve DSM 20213 and B. catenulatum DSM16992. The best non-Gardnerella blast matches, locus tags/ORF number and annotated function are also shown. (0.09 MB XLS) [file pone.0012411.s007.xls]

## Sheet: Sheet1
Locus Tag / ORF	Proposed function	Best non-Gardnerella BlastP hit
Strain 409-05
HMPREF0424_0002	alkyl hydroperoxide reductase, F subunit	Mobiluncus mulieris 28-1
HMPREF0424_0004	triacylglycerol lipase	Lactobacillus iners DSM 13335
HMPREF0424_0005	LPXTG-motif cell wall anchor domain protein	Bacillus cereus H3081.97
HMPREF0424_0010	conserved hypothetical protein	Burkholderia vietnamiensis G4
HMPREF0424_0015	conserved hypothetical protein	Thermobispora bispora DSM 43833
HMPREF0424_0048	hypothetical protein	No hit (e < 0.1)
HMPREF0424_0050	R3H domain protein	Bacillus weihenstephanensis KBAB4
HMPREF0424_0055	conserved hypothetical protein	Arcanobacterium haemolyticum DSM 20595
HMPREF0424_0068	ABC transporter, ATP-binding protein	Lactobacillus iners DSM 13335
HMPREF0424_0072	signal recognition particle-docking protein FtsY	Ruminococcus sp. 5_1_39B_FAA
HMPREF0424_0076	Mur ligase middle domain protein	Fervidobacterium nodosum Rt17-B1
HMPREF0424_0078	HicB-family TA system antitoxin	Atopobium vaginae DSM 15829
HMPREF0424_0079	uracil phosphoribosyltransferase	Enterococcus casseliflavus EC20
HMPREF0424_0081	hydrolase, NUDIX-family	Natranaerobius thermophilus JW/NM-WN-LF
HMPREF0424_0085	hypothetical protein	No hit (e < 0.1)
HMPREF0424_0090	hypothetical protein	Scardovia inopinata F0304
HMPREF0424_0091	hypothetical protein	Parascardovia denticolens F0305
HMPREF0424_0093	hypothetical protein	No hit (e < 0.1)
HMPREF0424_0094	ABC transporter, ATP-binding protein	Atopobium vaginae DSM 15829
HMPREF0424_0095	membrane protein	Scardovia inopinata F0304
HMPREF0424_0096	membrane protein	Scardovia inopinata F0304
HMPREF0424_0099	RNA methyltransferase, TrmH-family	Streptomyces phage phiSASD1
HMPREF0424_0101	membrane protein	No hit (e < 0.1)
HMPREF0424_0102	hypothetical protein	No hit (e < 0.1)
HMPREF0424_0103	Vaginolysin	Streptococcus intermedius
HMPREF0424_0105	aspartyl/glutamyl-tRNA amidotransferase subunit A	Scardovia inopinata F0304
HMPREF0424_0106	GatB/GatE catalytic domain protein	Mobiluncus mulieris 28-1
HMPREF0424_0114	fructose-bisphosphate aldolase class II	Clostridium lentocellum DSM 5427
HMPREF0424_0115	adenylosuccinate synthase	Atopobium vaginae DSM 15829
HMPREF0424_0118	chloride transporter, ClC-family	Arcanobacterium haemolyticum DSM 20595
HMPREF0424_0123	conserved domain protein	Propionibacterium acnes SK187
HMPREF0424_0154	sensor histidine kinase/response regulator	Clostridiales genomosp. BVAB3 str. UPII9-5
HMPREF0424_0157	Lantibiotic resistance ABC transporter, permease	Clostridiales genomosp. BVAB3 str. UPII9-5
HMPREF0424_0158	Lantibiotic resistance ABC transporter, permease	Clostridiales genomosp. BVAB3 str. UPII9-5
HMPREF0424_0159	hypothetical protein	Faecalibacterium prausnitzii M21/2
HMPREF0424_0167	hypothetical protein	No hit (e < 0.1)
HMPREF0424_0168	hypothetical protein	No hit (e < 0.1)
HMPREF0424_0170	hypothetical protein	No hit (e < 0.1)
HMPREF0424_0171	hypothetical protein	Mobiluncus mulieris ATCC 35243
HMPREF0424_0172	conserved domain protein	No hit (e < 0.1)
HMPREF0424_0173	TA system toxin	Mobiluncus mulieris ATCC 35243
HMPREF0424_0175	lipoprotein	No hit (e < 0.1)
HMPREF0424_0182	conserved domain protein	No hit (e < 0.1)
HMPREF0424_0193	RelE-family TA system toxin	Actinomyces odontolyticus ATCC 17982
HMPREF0424_0194	RelE-family TA system antitoxin	Collinsella aerofaciens ATCC 25986
HMPREF0424_0202	hypothetical protein	No hit (e < 0.1)
HMPREF0424_0208	hypothetical protein	Scardovia inopinata F0304
HMPREF0424_0219	hypothetical protein	No hit (e < 0.1)
HMPREF0424_0246	hypothetical protein	No hit (e < 0.1)
HMPREF0424_0247	hypothetical protein	No hit (e < 0.1)
HMPREF0424_0282	hypothetical protein	No hit (e < 0.1)
HMPREF0424_0295	hypothetical protein	No hit (e < 0.1)
HMPREF0424_0307	LPXTG-motif cell wall anchor domain protein	Caenorhabditis briggsae
HMPREF0424_0312	mevalonate kinase	Enterococcus faecalis ATCC 4200
HMPREF0424_0313	diphosphomevalonate decarboxylase	Streptomyces griseoflavus Tu4000
HMPREF0424_0314	isopentenyl-diphosphate delta-isomerase, type 2	Lactobacillus sakei subsp. sakei 23K
HMPREF0424_0317	kinase, PfkB-family	Lactobacillus brevis subsp. gravesensis ATCC 27305
HMPREF0424_0318	hypothetical protein	No hit (e < 0.1)
HMPREF0424_0322	hypothetical protein	No hit (e < 0.1)
HMPREF0424_0337	hypothetical protein	No hit (e < 0.1)
HMPREF0424_0345	hypothetical protein	No hit (e < 0.1)
HMPREF0424_0359	hydroxymethylglutaryl-CoA synthase	Lactobacillus casei ATCC 334
HMPREF0424_0360	hydroxymethylglutaryl-CoA reductase, degradative	Parascardovia denticolens F0305
HMPREF0424_0361	hypothetical protein	No hit (e < 0.1)
HMPREF0424_0362	acetyl-CoA C-acetyltransferase	Parascardovia denticolens F0305
HMPREF0424_0363	hypothetical protein	No hit (e < 0.1)
HMPREF0424_0370	hypothetical protein	No hit (e < 0.1)
HMPREF0424_0374	hypothetical protein	No hit (e < 0.1)
HMPREF0424_0401	hypothetical protein	No hit (e < 0.1)
HMPREF0424_0402	Family 1 glycosyltransferase	Clostridium methylpentosum DSM 5476
HMPREF0424_0407	hypothetical protein	No hit (e < 0.1)
HMPREF0424_0413	hypothetical protein	No hit (e < 0.1)
HMPREF0424_0417	hypothetical protein	No hit (e < 0.1)
HMPREF0424_0418	hypothetical protein	No hit (e < 0.1)
HMPREF0424_0419	hypothetical protein	No hit (e < 0.1)
HMPREF0424_0420	LPXTG-motif cell wall anchor domain protein	Actinomyces odontolyticus F0309
HMPREF0424_0421	hypothetical protein	No hit (e < 0.1)
HMPREF0424_0423	PA domain protein	Actinomyces urogenitalis DSM 15434
HMPREF0424_0424	hypothetical protein	No hit (e < 0.1)
HMPREF0424_0425	hypothetical protein	No hit (e < 0.1)
HMPREF0424_0426	LPXTG-motif cell wall anchor domain protein	Actinomyces odontolyticus ATCC 17982
HMPREF0424_0468	exonuclease	Scardovia inopinata F0304
HMPREF0424_0494	resolvase, N-terminal domain protein	Lactobacillus iners DSM 13335
HMPREF0424_0495	conserved hypothetical protein	Streptococcus mitis B6
HMPREF0424_0496	hypothetical protein	Clostridiales genomosp. BVAB3 str. UPII9-5
HMPREF0424_0498	cytidine/deoxycytidylate deaminase-family protein	Lactobacillus iners DSM 13335
HMPREF0424_0499	conserved hypothetical protein	Clostridiales genomosp. BVAB3 str. UPII9-5
HMPREF0424_0501	hypothetical protein	No hit (e < 0.1)
HMPREF0424_0502	hypothetical protein	Streptococcus mitis B6
HMPREF0424_0503	hypothetical protein	No hit (e < 0.1)
HMPREF0424_0505	hypothetical protein	No hit (e < 0.1)
HMPREF0424_0506	hypothetical protein	No hit (e < 0.1)
HMPREF0424_0510	conserved domain protein	Anaerostipes caccae DSM 14662
HMPREF0424_0512	PHD-family TA system antitoxin	Oribacterium sinus F0268
HMPREF0424_0513	hypothetical protein	No hit (e < 0.1)
HMPREF0424_0515	conserved hypothetical protein	Lactobacillus iners DSM 13335
HMPREF0424_0516	conserved domain protein	Parvimonas micra ATCC 33270
HMPREF0424_0519	hypothetical protein	Atopobium vaginae DSM 15829
HMPREF0424_0520	lipoprotein	Clostridiales genomosp. BVAB3 str. UPII9-5
HMPREF0424_0521	hypothetical protein	No hit (e < 0.1)
HMPREF0424_0522	hypothetical protein	Atopobium vaginae DSM 15829
HMPREF0424_0524	membrane protein	Atopobium parvulum DSM 20469
HMPREF0424_0525	ABC-2 type transporter	Atopobium rimae ATCC 49626
HMPREF0424_0526	conserved domain protein	No hit (e < 0.1)
HMPREF0424_0527	conserved hypothetical protein	Atopobium vaginae DSM 15829
HMPREF0424_0528	conserved domain protein	Lactobacillus iners DSM 13335
HMPREF0424_0529	hypothetical protein	Eubacterium saphenum ATCC 49989
HMPREF0424_0530	hypothetical protein	Coprococcus comes ATCC 27758
HMPREF0424_0531	conserved domain protein	No hit (e < 0.1)
HMPREF0424_0533	DNA binding domain, excisionase-family	Ethanoligenens harbinense YUAN-3
HMPREF0424_0534	DNA (cytosine-5-)-methyltransferase	Bacillus cereus H3081.97
HMPREF0424_0536	ATPase-family associated with various cellular activities (AAA)	Ethanoligenens harbinense YUAN-3
HMPREF0424_0537	LlaJI restriction endonuclease	Ethanoligenens harbinense YUAN-3
HMPREF0424_0539	hypothetical protein	No hit (e < 0.1)
HMPREF0424_0540	hypothetical protein	Peptostreptococcus anaerobius 653-L
HMPREF0424_0541	Listeria/Bacterioides repeat protein	Clostridiales genomosp. BVAB3 str. UPII9-5
HMPREF0424_0543	YcaO-like protein	Streptomyces scabiei 87.22
HMPREF0424_0545	GA module protein	Lactobacillus jensenii JV-V16
HMPREF0424_0546	conserved domain protein	No hit (e < 0.1)
HMPREF0424_0551	phosphorylase, Pnp/Udp-family	Anaerococcus tetradius ATCC 35098
HMPREF0424_0552	ABC transporter, ATP-binding protein	Clostridiales genomosp. BVAB3 str. UPII9-5
HMPREF0424_0553	hypothetical protein	No hit (e < 0.1)
HMPREF0424_0554	hypothetical protein	Finegoldia magna ATCC 53516
HMPREF0424_0555	LemA-family protein	Anaerococcus lactolyticus ATCC 51172
HMPREF0424_0556	conserved hypothetical protein	Arcanobacterium haemolyticum DSM 20595
HMPREF0424_0557	conserved hypothetical protein	Arcanobacterium haemolyticum DSM 20595
HMPREF0424_0558	Na+/H+ antiporter-family protein	Atopobium vaginae DSM 15829
HMPREF0424_0559	hypothetical protein	Eggerthella lenta DSM 2243
HMPREF0424_0560	YhgE/Pip C-terminal domain protein	Thermoanaerobacter mathranii subsp. mathranii str. A3
HMPREF0424_0563	pyroglutamyl-peptidase I	Thermoanaerobacter tengcongensis MB4
HMPREF0424_0564	HicB-family TA system antitoxin	Lactobacillus delbrueckii subsp. bulgaricus ATCC 11842
HMPREF0424_0565	conserved hypothetical protein	Clostridium botulinum C str. Eklund
HMPREF0424_0574	hypothetical protein	No hit (e < 0.1)
HMPREF0424_0602	TM2 domain protein	No hit (e < 0.1)
HMPREF0424_0604	TM2 domain protein	No hit (e < 0.1)
HMPREF0424_0611	membrane protein	Atopobium vaginae DSM 15829
HMPREF0424_0612	conserved hypothetical protein	Atopobium vaginae DSM 15829
HMPREF0424_0614	cobalt transport protein	Atopobium vaginae DSM 15829
HMPREF0424_0627	conserved hypothetical protein	Anaerococcus tetradius ATCC 35098
HMPREF0424_0628	CopY/TcrY-family copper transport repressor	Anaerococcus tetradius ATCC 35098
HMPREF0424_0643	hypothetical protein	Sorghum bicolor
HMPREF0424_0664	2-amino-4-hydroxy-6- hydroxymethyldihydropteridine diphosphokinase	Lactobacillus iners DSM 13335
HMPREF0424_0665	dihydropteroate synthase	Lactobacillus iners DSM 13335
HMPREF0424_0687	hypothetical protein	No hit (e < 0.1)
HMPREF0424_0695	conserved hypothetical protein	Ruminococcus sp. 5_1_39B_FAA
HMPREF0424_0696	conserved hypothetical protein	Bacteroides pectinophilus ATCC 43243
HMPREF0424_0697	conserved hypothetical protein	Ruminococcus sp. 5_1_39B_FAA
HMPREF0424_0698	phage prohead protease, HK97-family	Atopobium vaginae DSM 15829
HMPREF0424_0725	hypothetical protein	Clavibacter michiganensis subsp. sepedonicus
HMPREF0424_0726	hypothetical protein	Scardovia inopinata F0304
HMPREF0424_0727	conserved domain protein	No hit (e < 0.1)
HMPREF0424_0728	hypothetical protein	Lactobacillus iners DSM 13335
HMPREF0424_0729	hypothetical protein	Clostridiales genomosp. BVAB3 str. UPII9-5
HMPREF0424_0730	hypothetical protein	Bulleidia extructa W1219
HMPREF0424_0731	hypothetical protein	Bulleidia extructa W1219
HMPREF0424_0732	hydrolase, NUDIX-family	Lactobacillus iners DSM 13335
HMPREF0424_0733	cytidine/deoxycytidylate deaminase-family protein	Lactobacillus iners DSM 13335
HMPREF0424_0734	conserved hypothetical protein	Clostridiales genomosp. BVAB3 str. UPII9-5
HMPREF0424_0735	conserved hypothetical protein	Clavibacter michiganensis subsp. sepedonicus
HMPREF0424_0736	membrane protein	No hit (e < 0.1)
HMPREF0424_0737	conserved domain protein	No hit (e < 0.1)
HMPREF0424_0738	hypothetical protein	Eubacterium eligens ATCC 27750
HMPREF0424_0739	hypothetical protein	Lactobacillus iners DSM 13335
HMPREF0424_0740	hypothetical protein	Lactobacillus iners DSM 13335
HMPREF0424_0741	hypothetical protein	Clostridium nexile DSM 1787
HMPREF0424_0742	hypothetical protein	Clostridiales genomosp. BVAB3 str. UPII9-5
HMPREF0424_0743	hypothetical protein	Treponema vincentii ATCC 35580
HMPREF0424_0744	hypothetical protein	No hit (e < 0.1)
HMPREF0424_0746	RelB-family TA system toxin	Lactobacillus iners DSM 13335
HMPREF0424_0750	Eco57I restriction endonuclease	Streptobacillus moniliformis DSM 12112
HMPREF0424_0751	conserved hypothetical protein	Corynebacterium jeikeium K411
HMPREF0424_0752	conserved hypothetical protein	Corynebacterium lipophiloflavum DSM 44291
HMPREF0424_0758	hypothetical protein	Dorea formicigenerans ATCC 27755
HMPREF0424_0760	CRISPR system CASCADE complex protein CasA	Atopobium vaginae DSM 15829
HMPREF0424_0761	CRISPR system CASCADE complex protein CasB	Atopobium vaginae DSM 15829
HMPREF0424_0764	CRISPR system CASCADE complex protein CasE	Atopobium vaginae DSM 15829
HMPREF0424_0767	hypothetical protein	No hit (e < 0.1)
HMPREF0424_0773	allantoate amidohydrolase	Lactobacillus buchneri ATCC 11577
HMPREF0424_0774	NCS1 nucleoside transporter-family protein	Enterococcus casseliflavus EC20
HMPREF0424_0775	allantoinase	Enterococcus casseliflavus EC20
HMPREF0424_0776	thiamine biosynthesis protein ThiS	Anaerococcus tetradius ATCC 35098
HMPREF0424_0796	hypothetical protein	No hit (e < 0.1)
HMPREF0424_0810	hypothetical protein	Ralstonia eutropha H16
HMPREF0424_0842	ABC 3 transport-family protein	Corynebacterium diphtheriae NCTC 13129
HMPREF0424_0843	ABC 3 transport-family protein	Corynebacterium diphtheriae NCTC 13129
HMPREF0424_0846	hypothetical protein	No hit (e < 0.1)
HMPREF0424_0847	YjeF domain protein	No hit (e < 0.1)
HMPREF0424_0855	hypothetical protein	No hit (e < 0.1)
HMPREF0424_0856	conserved domain protein	Yersinia intermedia ATCC 29909
HMPREF0424_0870	conserved hypothetical protein	Ruminococcus flavefaciens FD-1
HMPREF0424_0871	conserved domain protein	Ruminococcus obeum ATCC 29174
HMPREF0424_0874	nucleoside triphosphatase, D5-family	Coprococcus eutactus ATCC 27759
HMPREF0424_0875	phage capsid-family protein	Coprococcus eutactus ATCC 27759
HMPREF0424_0876	TnpX site-specific recombinase-family protein	Clostridium perfringens C str. JGS1495
HMPREF0424_0880	hypothetical protein	Staphylothermus hellenicus DSM 12710
HMPREF0424_0884	hypothetical protein	Leptospira biflexa serovar Patoc strain 'Patoc 1 (Paris)'
HMPREF0424_0894	LPXTG-motif cell wall anchor domain protein	Atopobium vaginae DSM 15829
HMPREF0424_0897	hypothetical protein	No hit (e < 0.1)
HMPREF0424_0929	hypothetical protein	Psychroflexus torquis ATCC 700755
HMPREF0424_0931	LPXTG-motif cell wall anchor domain protein	Atopobium vaginae DSM 15829
HMPREF0424_0932	hypothetical protein	No hit (e < 0.1)
HMPREF0424_0945	conserved hypothetical protein	Bacteroides capillosus ATCC 29799
HMPREF0424_0946	conserved hypothetical protein	Collinsella stercoris DSM 13279
HMPREF0424_0953	hypothetical protein	No hit (e < 0.1)
HMPREF0424_0956	site-specific recombinase, phage integrase-family	Mycobacterium kansasii ATCC 12478
HMPREF0424_0958	DNA-binding protein	Actinomyces urogenitalis DSM 15434
HMPREF0424_0960	conserved domain protein	No hit (e < 0.1)
HMPREF0424_0961	conserved domain protein	Rhodobacterales bacterium Y4I
HMPREF0424_0962	hypothetical protein	No hit (e < 0.1)
HMPREF0424_0964	hypothetical protein	No hit (e < 0.1)
HMPREF0424_0965	hypothetical protein	Pan troglodytes
HMPREF0424_0967	hypothetical protein	Corynebacterium glutamicum R
HMPREF0424_0968	hypothetical protein	No hit (e < 0.1)
HMPREF0424_0969	hypothetical protein	No hit (e < 0.1)
HMPREF0424_0971	hypothetical protein	Cryptobacterium curtum DSM 15641
HMPREF0424_0973	hypothetical protein	Tetrahymena thermophila
HMPREF0424_0974	hypothetical protein	No hit (e < 0.1)
HMPREF0424_0976	hypothetical protein	No hit (e < 0.1)
HMPREF0424_0977	hypothetical protein	No hit (e < 0.1)
HMPREF0424_0978	hypothetical protein	Streptomyces ghanaensis ATCC 14672
HMPREF0424_0979	hypothetical protein	Methanococcoides burtonii DSM 6242
HMPREF0424_0980	hypothetical protein	No hit (e < 0.1)
HMPREF0424_0982	conserved hypothetical protein	Nocardia farcinica IFM 10152
HMPREF0424_0983	conserved hypothetical protein	Aeromicrobium marinum DSM 15272
HMPREF0424_0984	hypothetical protein	No hit (e < 0.1)
HMPREF0424_0985	hypothetical protein	Aeromicrobium marinum DSM 15272
HMPREF0424_0986	hypothetical protein	Streptomyces phage phiSASD1
HMPREF0424_0987	conserved hypothetical protein	Clostridium phage 39-O
HMPREF0424_0988	hypothetical protein	Streptomyces phage phiSASD1
HMPREF0424_0993	hypothetical protein	No hit (e < 0.1)
HMPREF0424_0998	hypothetical protein	Arthroderma otae CBS 113480
HMPREF0424_0999	hypothetical protein	No hit (e < 0.1)
HMPREF0424_1001	hypothetical protein	Clostridium botulinum A3 str. Loch Maree
HMPREF0424_1003	hypothetical protein	Slackia heliotrinireducens DSM 20476
HMPREF0424_1004	hypothetical protein	No hit (e < 0.1)
HMPREF0424_1009	hypothetical protein	Anaerofustis stercorihominis DSM 17244
HMPREF0424_1010	LytTr DNA-binding domain protein	Anaerofustis stercorihominis DSM 17244
HMPREF0424_1026	Type-I fimbrial major subunit precursor	Actinomyces odontolyticus ATCC 17982
HMPREF0424_1027	hypothetical protein	No hit (e < 0.1)
HMPREF0424_1045	membrane protein	Leptotrichia goodfellowii F0264
HMPREF0424_1046	cobalt transport protein	Clostridium scindens ATCC 35704
HMPREF0424_1061	RelB-family TA system antitoxin	Filifactor alocis ATCC 35896
HMPREF0424_1062	LPXTG-motif cell wall anchor domain protein	Helicobacter hepaticus ATCC 51449
HMPREF0424_1093	hypothetical protein	No hit (e < 0.1)
HMPREF0424_1095	conserved domain protein	Collinsella aerofaciens ATCC 25986
HMPREF0424_1111	hypothetical protein	No hit (e < 0.1)
HMPREF0424_1128	hypothetical protein	No hit (e < 0.1)
HMPREF0424_1145	hypothetical protein	No hit (e < 0.1)
HMPREF0424_1146	hypothetical protein	Herpetosiphon aurantiacus ATCC 23779
HMPREF0424_1155	membrane protein	No hit (e < 0.1)
HMPREF0424_1156	hypothetical protein	No hit (e < 0.1)
HMPREF0424_1160	hypothetical protein	No hit (e < 0.1)
HMPREF0424_1162	hypothetical protein	No hit (e < 0.1)
HMPREF0424_1163	hypothetical protein	No hit (e < 0.1)
HMPREF0424_1164	Type-II fimbrial major subunit precursor	Actinomyces naeslundii
HMPREF0424_1166	hypothetical protein	No hit (e < 0.1)
HMPREF0424_1167	conserved hypothetical protein	Peptoniphilus sp. oral taxon 386 str. F0131
HMPREF0424_1181	Family 1 glycosyltransferase	Aeromicrobium marinum DSM 15272
HMPREF0424_1184	membrane protein	Oenococcus oeni ATCC BAA-1163
HMPREF0424_1187	membrane protein	No hit (e < 0.1)
HMPREF0424_1188	phosphotransferase enzyme-family protein	Eggerthella lenta DSM 2243
HMPREF0424_1191	membrane protein	Eggerthella lenta DSM 2243
HMPREF0424_1195	hypothetical protein	No hit (e < 0.1)
HMPREF0424_1196	Rib-family surface antigen	Lactobacillus iners DSM 13335
HMPREF0424_1206	hypothetical protein	Actinomyces odontolyticus F0309
HMPREF0424_1207	membrane protein	No hit (e < 0.1)
HMPREF0424_1208	hypothetical protein	No hit (e < 0.1)
HMPREF0424_1210	conserved domain protein	No hit (e < 0.1)
HMPREF0424_1212	conserved hypothetical protein	Finegoldia magna ATCC 29328
HMPREF0424_1215	LPXTG-motif cell wall anchor domain protein	Actinomyces odontolyticus ATCC 17982
HMPREF0424_1216	hypothetical protein	No hit (e < 0.1)
HMPREF0424_1226	TA system antitoxin	Mobiluncus mulieris ATCC 35243
HMPREF0424_1227	hypothetical protein	Mobiluncus mulieris ATCC 35243
HMPREF0424_1228	conserved hypothetical protein	Peptostreptococcus anaerobius 653-L
HMPREF0424_1236	anchored repeat-type ABC transporter, permease subunit	Micromonospora sp. ATCC 39149
HMPREF0424_1239	ABC transporter-associated repeat protein	Corynebacterium diphtheriae NCTC 13129
HMPREF0424_1240	actinobacterial surface-anchored protein domain protein	Rothia mucilaginosa ATCC 25296
HMPREF0424_1241	actinobacterial surface-anchored protein domain protein	Propionibacterium acnes J139
HMPREF0424_1242	isochorismatase	Atopobium vaginae DSM 15829
HMPREF0424_1265	lipoprotein	No hit (e < 0.1)
HMPREF0424_1285	thiamine biosynthesis protein ThiS	Thermobispora bispora DSM 43833
HMPREF0424_1286	glycine oxidase ThiO	Corynebacterium kroppenstedtii DSM 44385
HMPREF0424_1300	conserved domain protein	No hit (e < 0.1)
HMPREF0424_1312	periplasmic binding protein and sugar binding domain of the LacI-family protein	Roseiflexus sp. RS-1
HMPREF0424_1318	transporter, major facilitator-family protein	Streptomyces sp. SPB78
HMPREF0424_1319	hypothetical protein	Ruminococcus obeum ATCC 29174
HMPREF0424_1323	hypothetical protein	No hit (e < 0.1)
HMPREF0424_1327	nitroreductase-family protein	Arcanobacterium haemolyticum DSM 20595
HMPREF0424_1349	tryptophan synthase, beta subunit	Gemella haemolysans ATCC 10379
HMPREF0424_1350	hypothetical protein	No hit (e < 0.1)
Strain 317
HMPREF0421_20001	hypothetical protein	No hit (e < 0.1)
HMPREF0421_20015	possible multidrug efflux protein	Corynebacterium matruchotii ATCC 14126
HMPREF0421_20016	hypothetical protein	No hit (e < 0.1)
HMPREF0421_20022	addiction module killer protein	Lactobacillus iners DSM 13335
HMPREF0421_20028	conserved hypothetical protein	No hit (e < 0.1)
HMPREF0421_20038	ABC transporter, ATP-binding protein	Conexibacter woesei DSM 14684
HMPREF0421_20049	conserved domain protein	No hit (e < 0.1)
HMPREF0421_20066	Vaginolysin	Streptococcus intermedius
HMPREF0421_20069	hypothetical protein	No hit (e < 0.1)
HMPREF0421_20073	membrane protein	Scardovia inopinata F0304
HMPREF0421_20074	hypothetical protein	No hit (e < 0.1)
HMPREF0421_20076	hypothetical protein	No hit (e < 0.1)
HMPREF0421_20082	hypothetical protein	No hit (e < 0.1)
HMPREF0421_20083	polyphosphate kinase 1	Clostridiales genomosp. BVAB3 str. UPII9-5
HMPREF0421_20084	hypothetical protein	Atopobium vaginae DSM 15829
HMPREF0421_20089	uracil phosphoribosyltransferase	Actinomyces coleocanis DSM 15436
HMPREF0421_20101	possible alpha-L-fucosidase	Actinomyces odontolyticus F0309
HMPREF0421_20107	conserved hypothetical protein	Thermoanaerobacter mathranii subsp. mathranii str. A3
HMPREF0421_20111	conserved hypothetical protein	Rothia mucilaginosa DY-18
HMPREF0421_20113	tRNA adenylyltransferase	Atopobium vaginae DSM 15829
HMPREF0421_20116	integral membrane protein MviN	Parascardovia denticolens F0305
HMPREF0421_20121	16S rRNA methyltransferase GidB	Lactobacillus sakei subsp. sakei 23K
HMPREF0421_20125	ribosomal protein L34	Staphylococcus epidermidis W23144
HMPREF0421_20128	DNA replication and repair protein RecF	Providencia stuartii ATCC 25827
HMPREF0421_20167	LPxTG-domain protein	No hit (e < 0.1)
HMPREF0421_20170	LPxTG-domain protein	No hit (e < 0.1)
HMPREF0421_20172	triacylglycerol lipase	Lactobacillus iners DSM 13335
HMPREF0421_20183	hypothetical protein	No hit (e < 0.1)
HMPREF0421_20186	hypothetical protein	No hit (e < 0.1)
HMPREF0421_20189	nitroreductase-family protein	Arcanobacterium haemolyticum DSM 20595
HMPREF0421_20192	hypothetical protein	No hit (e < 0.1)
HMPREF0421_20211	hypothetical protein	Rhodococcus erythropolis PR4
HMPREF0421_20212	hypothetical protein	No hit (e < 0.1)
HMPREF0421_20213	hypothetical protein	No hit (e < 0.1)
HMPREF0421_20218	hypothetical protein	Ruminococcus obeum ATCC 29174
HMPREF0421_20219	transporter, major facilitator-family protein	Streptomyces sp. SPB78
HMPREF0421_20220	hypothetical protein	No hit (e < 0.1)
HMPREF0421_20225	periplasmic binding protein and sugar binding domain of the LacI-family protein	Roseiflexus sp. RS-1
HMPREF0421_20230	hypothetical protein	No hit (e < 0.1)
HMPREF0421_20238	hypothetical protein	No hit (e < 0.1)
HMPREF0421_20250	hypothetical protein	No hit (e < 0.1)
HMPREF0421_20251	LPXTG-motif cell wall anchor domain protein	Atopobium vaginae DSM 15829
HMPREF0421_20252	hypothetical protein	No hit (e < 0.1)
HMPREF0421_20253	glycine oxidase ThiO	Corynebacterium kroppenstedtii DSM 44385
HMPREF0421_20254	thiamine biosynthesis protein ThiS	Streptomyces viridochromogenes DSM 40736
HMPREF0421_20266	hypothetical protein	No hit (e < 0.1)
HMPREF0421_20271	hypothetical protein	No hit (e < 0.1)
HMPREF0421_20272	hypothetical protein	No hit (e < 0.1)
HMPREF0421_20277	Cell surface protein	Renibacterium salmoninarum ATCC 33209
HMPREF0421_20278	hypothetical protein	No hit (e < 0.1)
HMPREF0421_20298	hypothetical protein	No hit (e < 0.1)
HMPREF0421_20301	hypothetical protein	No hit (e < 0.1)
HMPREF0421_20302	isochorismatase	Atopobium vaginae DSM 15829
HMPREF0421_20303	actinobacterial surface-anchored protein domain protein	Arcanobacterium haemolyticum DSM 20595
HMPREF0421_20304	hypothetical protein	No hit (e < 0.1)
HMPREF0421_20305	actinobacterial surface-anchored protein domain protein	Rothia mucilaginosa ATCC 25296
HMPREF0421_20306	hypothetical protein	No hit (e < 0.1)
HMPREF0421_20307	hypothetical protein	Rothia mucilaginosa DY-18
HMPREF0421_20308	anchored repeat ABC transporter, substrate-binding protein	Actinomyces coleocanis DSM 15436
HMPREF0421_20310	anchored repeat-type ABC transporter, permease subunit	Micromonospora sp. ATCC 39149
HMPREF0421_20318	hypothetical protein	No hit (e < 0.1)
HMPREF0421_20319	hypothetical protein	No hit (e < 0.1)
HMPREF0421_20320	hypothetical protein	No hit (e < 0.1)
HMPREF0421_20333	kinase domain protein	Parascardovia denticolens F0305
HMPREF0421_20344	hypothetical protein	No hit (e < 0.1)
HMPREF0421_20351	hypothetical protein	No hit (e < 0.1)
HMPREF0421_20360	hypothetical protein	No hit (e < 0.1)
HMPREF0421_20364	hypothetical protein	No hit (e < 0.1)
HMPREF0421_20367	hypothetical protein	No hit (e < 0.1)
HMPREF0421_20370	hypothetical protein	No hit (e < 0.1)
HMPREF0421_20371	hypothetical protein	No hit (e < 0.1)
HMPREF0421_20388	hypothetical protein	No hit (e < 0.1)
HMPREF0421_20406	polysaccharide ABC superfamily ATP binding cassette transporter, membrane protein	Arthrobacter aurescens TC1
HMPREF0421_20414	family 2 glycosyl transferase	Streptococcus infantarius subsp. infantarius ATCC BAA-102
HMPREF0421_20421	hypothetical protein	No hit (e < 0.1)
HMPREF0421_20422	hypothetical protein	No hit (e < 0.1)
HMPREF0421_20425	hypothetical protein	No hit (e < 0.1)
HMPREF0421_20429	hypothetical protein	No hit (e < 0.1)
HMPREF0421_20442	hypothetical protein	No hit (e < 0.1)
HMPREF0421_20448	methicillin resistance protein	Mobiluncus mulieris 28-1
HMPREF0421_20449	GA module protein	Lactobacillus jensenii SJ-7A-US
HMPREF0421_20453	glycoside hydrolase family 31	Nakamurella multipartita DSM 44233
HMPREF0421_20481	PA domain protein	Brachybacterium faecium DSM 4810
HMPREF0421_20498	hypothetical protein	Corynebacterium jeikeium ATCC 43734
HMPREF0421_20499	LPxTG-domain protein	No hit (e < 0.1)
HMPREF0421_20500	Type-I fimbrial major subunit precursor	Actinomyces odontolyticus F0309
HMPREF0421_20505	hypothetical protein	No hit (e < 0.1)
HMPREF0421_20506	ABC transporter substrate-binding protein	Actinomyces odontolyticus F0309
HMPREF0421_20507	aminoglycoside phosphotransferase	Actinomyces odontolyticus F0309
HMPREF0421_20545	Family 1 glycosyltransferase	Clostridium methylpentosum DSM 5476
HMPREF0421_20555	hypothetical protein	No hit (e < 0.1)
HMPREF0421_20556	membrane protein	No hit (e < 0.1)
HMPREF0421_20557	conserved hypothetical protein	Atopobium vaginae DSM 15829
HMPREF0421_20559	cobalt transport protein	Atopobium vaginae DSM 15829
HMPREF0421_20608	autotransporter, putative	Atopobium vaginae DSM 15829
HMPREF0421_20609	conserved hypothetical protein	Ruminococcus sp. 5_1_39B_FAA
HMPREF0421_20610	conserved hypothetical protein	Treponema vincentii ATCC 35580
HMPREF0421_20611	hypothetical protein	No hit (e < 0.1)
HMPREF0421_20612	LPxTG-domain protein	Clostridiales genomosp. BVAB3 str. UPII9-5
HMPREF0421_20613	prophage ps3 protein 1	Desulfotomaculum acetoxidans DSM 771
HMPREF0421_20614	hypothetical protein	Desulfotomaculum acetoxidans DSM 771
HMPREF0421_20616	phage prohead protease, HK97-family	Atopobium vaginae DSM 15829
HMPREF0421_20617	LPxTG-domain protein	No hit (e < 0.1)
HMPREF0421_20618	conserved hypothetical protein	Atopobium vaginae DSM 15829
HMPREF0421_20621	hypothetical protein	No hit (e < 0.1)
HMPREF0421_20635	hypothetical protein	No hit (e < 0.1)
HMPREF0421_20647	hypothetical protein	No hit (e < 0.1)
HMPREF0421_20666	hypothetical protein	No hit (e < 0.1)
HMPREF0421_20667	hypothetical protein	No hit (e < 0.1)
HMPREF0421_20668	hypothetical protein	No hit (e < 0.1)
HMPREF0421_20670	hypothetical protein	Atopobium vaginae DSM 15829
HMPREF0421_20671	CRISPR system CASCADE complex protein CasA	Atopobium vaginae DSM 15829
HMPREF0421_20672	CRISPR system CASCADE complex protein CasB	Atopobium vaginae DSM 15829
HMPREF0421_20675	CRISPR system CASCADE complex protein CasE	Atopobium vaginae DSM 15829
HMPREF0421_20679	hypothetical protein	No hit (e < 0.1)
HMPREF0421_20680	hypothetical protein	No hit (e < 0.1)
HMPREF0421_20681	hypothetical protein	No hit (e < 0.1)
HMPREF0421_20686	periplasmic solute binding-family protein	Actinomyces odontolyticus F0309
HMPREF0421_20688	ABC 3 transport-family protein	Corynebacterium diphtheriae NCTC 13129
HMPREF0421_20689	ABC 3 transport-family protein	Corynebacterium diphtheriae NCTC 13129
HMPREF0421_20700	hypothetical protein	No hit (e < 0.1)
HMPREF0421_20716	lipoprotein	No hit (e < 0.1)
HMPREF0421_20725	hypothetical protein	No hit (e < 0.1)
HMPREF0421_20731	conserved hypothetical protein	Bacteroides capillosus ATCC 29799
HMPREF0421_20754	hypothetical protein	No hit (e < 0.1)
HMPREF0421_20773	transcriptional regulator, XRE family	Clostridiales genomosp. BVAB3 str. UPII9-5
HMPREF0421_20774	DNA recombinase, putative	Clostridium scindens ATCC 35704
HMPREF0421_20775	conserved hypothetical protein	Parvimonas micra ATCC 33270
HMPREF0421_20776	hydrolase	Clostridium difficile QCD-66c26
HMPREF0421_20778	AcrR family transcriptional regulator	Clostridium acetobutylicum ATCC 824
HMPREF0421_20780	conserved hypothetical protein	Shuttleworthia satelles DSM 14600
HMPREF0421_20784	hypothetical protein	No hit (e < 0.1)
HMPREF0421_20785	hypothetical protein	Lactobacillus iners DSM 13335
HMPREF0421_20787	conserved hypothetical protein	No hit (e < 0.1)
HMPREF0421_20838	LysR substrate binding domain protein	Actinomyces coleocanis DSM 15436
HMPREF0421_20839	alkyl hydroperoxide reductase, F subunit	Mobiluncus mulieris ATCC 35243
HMPREF0421_20878	hypothetical protein	No hit (e < 0.1)
HMPREF0421_20901	MFS family major facilitator transporter	Bacillus subtilis subsp. spizizenii ATCC 6633
HMPREF0421_20902	hypothetical protein	Leptothrix cholodnii SP-6
HMPREF0421_20903	membrane protein	Leptotrichia buccalis DSM 1135
HMPREF0421_20904	cobalt transport protein	Geobacillus sp. Y412MC10
HMPREF0421_20921	hypothetical protein	No hit (e < 0.1)
HMPREF0421_20936	hypothetical protein	No hit (e < 0.1)
HMPREF0421_20941	conserved hypothetical protein	Ruminococcus lactaris ATCC 29176
HMPREF0421_20942	conserved hypothetical protein	Oribacterium sp. oral taxon 078 str. F0262
HMPREF0421_20949	conserved hypothetical protein	Atopobium vaginae DSM 15829
HMPREF0421_20950	hypothetical protein	No hit (e < 0.1)
HMPREF0421_20955	conserved hypothetical protein	Lactobacillus ultunensis DSM 16047
HMPREF0421_20956	hypothetical protein	No hit (e < 0.1)
HMPREF0421_20969	hypothetical protein	No hit (e < 0.1)
HMPREF0421_20971	hypothetical protein	Anaerofustis stercorihominis DSM 17244
HMPREF0421_20972	LytTr DNA-binding domain protein	Eubacterium rectale ATCC 33656
HMPREF0421_20982	conserved hypothetical protein	No hit (e < 0.1)
HMPREF0421_20999	hypothetical protein	No hit (e < 0.1)
HMPREF0421_21005	conserved hypothetical protein	Dorea formicigenerans ATCC 27755
HMPREF0421_21006	HicB-family TA system antitoxin	Lactobacillus delbrueckii subsp. bulgaricus ATCC 11842
HMPREF0421_21007	pyroglutamyl-peptidase I	Thermoanaerobacter tengcongensis MB4
HMPREF0421_21010	TENA/THI-4 protein	Rothia mucilaginosa ATCC 25296
HMPREF0421_21011	YhgE/Pip C-terminal domain protein	Thermoanaerobacter mathranii subsp. mathranii str. A3
HMPREF0421_21012	hypothetical protein	Eggerthella lenta DSM 2243
HMPREF0421_21014	KDGT family 2-keto-3-deoxygluconate transporter	Granulicatella adiacens ATCC 49175
HMPREF0421_21017	Na+/H+ antiporter-family protein	Atopobium vaginae DSM 15829
HMPREF0421_21019	conserved hypothetical protein	Nitrosopumilus maritimus SCM1
HMPREF0421_21020	LemA-family protein	Anaerococcus tetradius ATCC 35098
HMPREF0421_21021	hypothetical protein	Finegoldia magna ATCC 53516
HMPREF0421_21022	LytS signal transduction histidine kinase	Atopobium vaginae DSM 15829
HMPREF0421_21028	ABC transporter, ATP-binding protein	Clostridiales genomosp. BVAB3 str. UPII9-5
HMPREF0421_21029	hypothetical protein	Clostridiales genomosp. BVAB3 str. UPII9-5
HMPREF0421_21030	phosphorylase, Pnp/Udp-family	Anaerococcus tetradius ATCC 35098
HMPREF0421_21032	serine acetyltransferase	Atopobium vaginae DSM 15829
HMPREF0421_21036	ABC-2 type transporter	Atopobium rimae ATCC 49626
HMPREF0421_21037	membrane protein	Atopobium parvulum DSM 20469
HMPREF0421_21040	hypothetical protein	No hit (e < 0.1)
HMPREF0421_21041	lipoprotein	No hit (e < 0.1)
HMPREF0421_21044	conserved hypothetical protein	Clostridiales genomosp. BVAB3 str. UPII9-5
HMPREF0421_21045	iron (Fe3+) ABC superfamily ATP binding cassette	Rothia mucilaginosa ATCC 25296
HMPREF0421_21046	hypothetical protein	Atopobium vaginae DSM 15829
HMPREF0421_21047	hypothetical protein	No hit (e < 0.1)
HMPREF0421_21048	hypothetical protein	Clostridiales genomosp. BVAB3 str. UPII9-5
HMPREF0421_21049	hypothetical protein	No hit (e < 0.1)
HMPREF0421_21050	membrane protein	No hit (e < 0.1)
HMPREF0421_21052	hypothetical protein	Lactobacillus iners DSM 13335
HMPREF0421_21053	conserved hypothetical protein	Lactobacillus iners DSM 13335
HMPREF0421_21054	hypothetical protein	Anaerococcus prevotii DSM 20548
HMPREF0421_21057	PHD-family TA system antitoxin	Oribacterium sinus F0268
HMPREF0421_21060	GNAT family acetyltransferase	Granulicatella elegans ATCC 700633
HMPREF0421_21061	hypothetical protein	Peptostreptococcus anaerobius 653-L
HMPREF0421_21064	conserved hypothetical protein	Fusobacterium sp. 3_1_33
HMPREF0421_21065	transcriptional regulator	Streptococcus equi subsp. zooepidemicus
HMPREF0421_21068	Cadmium resistance protein	Lactobacillus iners DSM 13335
HMPREF0421_21069	acetyltransferase	Clostridiales genomosp. BVAB3 str. UPII9-5
HMPREF0421_21071	conserved hypothetical protein	Atopobium vaginae DSM 15829
HMPREF0421_21075	hypothetical protein	Clostridiales genomosp. BVAB3 str. UPII9-5
HMPREF0421_21101	hypothetical protein	No hit (e < 0.1)
HMPREF0421_21104	hydroxymethylglutaryl-CoA reductase, degradative	Parascardovia denticolens F0305
HMPREF0421_21105	hydroxymethylglutaryl-CoA synthase	Lactobacillus casei ATCC 334
HMPREF0421_21106	hypothetical protein	No hit (e < 0.1)
HMPREF0421_21108	hypothetical protein	No hit (e < 0.1)
HMPREF0421_21110	hypothetical protein	No hit (e < 0.1)
HMPREF0421_21112	hypothetical protein	No hit (e < 0.1)
HMPREF0421_21113	Type-I fimbrial major subunit precursor	Corynebacterium striatum ATCC 6940
HMPREF0421_21114	hypothetical protein	No hit (e < 0.1)
HMPREF0421_21115	hypothetical protein	No hit (e < 0.1)
HMPREF0421_21116	hypothetical protein	No hit (e < 0.1)
HMPREF0421_21117	hypothetical protein	No hit (e < 0.1)
HMPREF0421_21149	hypothetical protein	No hit (e < 0.1)
HMPREF0421_21152	isopentenyl-diphosphate delta-isomerase, type 2	Streptomyces sp. CL190
HMPREF0421_21153	diphosphomevalonate decarboxylase	Streptococcus suis 89/1591
HMPREF0421_21154	mevalonate kinase	Granulicatella elegans ATCC 700633
HMPREF0421_21155	putative cell surface protein precursor SprD	Atopobium vaginae DSM 15829
HMPREF0421_21171	conserved hypothetical protein	Streptococcus pneumoniae TIGR4
HMPREF0421_21173	hypothetical protein	Catenibacterium mitsuokai DSM 15897
HMPREF0421_21179	hypothetical protein	No hit (e < 0.1)
HMPREF0421_21180	PTS family oligomeric beta-glucoside porter component IIC	Clostridium butyricum E4 str. BoNT E BL5262
HMPREF0421_21181	conserved hypothetical protein	Streptococcus suis 05ZYH33
HMPREF0421_21184	exonuclease	Parascardovia denticolens F0305
HMPREF0421_21192	hypothetical protein	No hit (e < 0.1)
HMPREF0421_21194	conserved hypothetical protein	Lactobacillus ultunensis DSM 16047
HMPREF0421_21195	possible surface anchor protein	Atopobium vaginae DSM 15829
HMPREF0421_21196	hypothetical protein	Atopobium vaginae DSM 15829
HMPREF0421_21197	hypothetical protein	No hit (e < 0.1)
HMPREF0421_21201	membrane protein	Atopobium vaginae DSM 15829
HMPREF0421_21202	conserved hypothetical protein	Staphylococcus epidermidis W23144
HMPREF0421_21204	Type-II fimbrial major subunit precursor	Actinomyces naeslundii
HMPREF0421_21206	hypothetical protein	No hit (e < 0.1)
HMPREF0421_21218	hypothetical protein	No hit (e < 0.1)
HMPREF0421_21226	Rib-family surface antigen	Lactobacillus iners DSM 13335
HMPREF0421_21231	hypothetical protein	No hit (e < 0.1)
HMPREF0421_21234	choloylglycine hydrolase	Erysipelothrix rhusiopathiae ATCC 19414
HMPREF0421_21235	inner membrane protein	Providencia stuartii ATCC 25827
HMPREF0421_21236	cytoplasmic protein	Corynebacterium glucuronolyticum ATCC 51866
HMPREF0421_21238	conserved hypothetical protein	Peptoniphilus lacrimalis 315-B
HMPREF0421_21246	cryptic beta-D-galactosidase subunit beta	Shigella boydii CDC 3083-94
HMPREF0421_21247	Evolved beta-D-galactosidase, alpha subunit	Actinomyces urogenitalis DSM 15434
HMPREF0421_21248	beta-phosphoglucomutase	Coprococcus comes ATCC 27758
HMPREF0421_21249	DMT superfamily drug/metabolite transporter	Abiotrophia defectiva ATCC 49176
HMPREF0421_21250	kojibiose phosphorylase	Coprococcus comes ATCC 27758
HMPREF0421_21291	hypothetical protein	No hit (e < 0.1)
HMPREF0421_21312	conserved hypothetical protein	Roseburia intestinalis L1-82
HMPREF0421_21340	hypothetical protein	No hit (e < 0.1)
HMPREF0421_21342	hypothetical protein	No hit (e < 0.1)
HMPREF0421_21343	hypothetical protein	No hit (e < 0.1)
HMPREF0421_21346	hypothetical protein	No hit (e < 0.1)
HMPREF0421_21347	hypothetical protein	Mobiluncus mulieris ATCC 35243
HMPREF0421_21348	hypothetical protein	No hit (e < 0.1)
HMPREF0421_21349	conserved hypothetical protein	Parascardovia denticolens F0305
HMPREF0421_21350	hypothetical protein	Atopobium vaginae DSM 15829
HMPREF0421_21359	hypothetical protein	No hit (e < 0.1)
HMPREF0421_21360	hypothetical protein	No hit (e < 0.1)
HMPREF0421_21361	Lantibiotic resistance ABC transporter, permease	Clostridiales genomosp. BVAB3 str. UPII9-5
HMPREF0421_21362	Lantibiotic resistance ABC transporter, permease	Clostridiales genomosp. BVAB3 str. UPII9-5
HMPREF0421_21365	sensor histidine kinase/response regulator	Clostridiales genomosp. BVAB3 str. UPII9-5
HMPREF0421_21369	hypothetical protein	Roseburia intestinalis L1-82
Strain 594
1	Site-specific recombinase	Bryantella formatexigens DSM 14469
2	acetyltransferase	Clostridiales genomosp. BVAB3 str. UPII9-5
3	hypothetical protein	Lactobacillus iners DSM 13335
4	conserved hypothetical protein	Atopobium vaginae DSM 15829
9	heat-inducible transcription repressor HrcA	Clostridium butyricum E4 str. BoNT E BL5262
16	hypothetical protein	Selenomonas flueggei ATCC 43531
21	hypothetical protein	No hit (e < 0.1)
26	GTP-binding protein YchF	Oribacterium sp. oral taxon 078 str. F0262
30	conserved hypothetical protein	Singapore grouper iridovirus
42	hypothetical protein	No hit (e < 0.1)
54	peptide chain release factor 2	Streptococcus infantarius subsp. infantarius ATCC BAA-102
58	hypothetical protein	No hit (e < 0.1)
59	COG0544: FKBP-type peptidyl-prolyl cis-trans isomerase (trigger factor	Clostridium sp. M62/1
62	Clp protease	Rothia mucilaginosa DY-18
67	hypothetical protein	No hit (e < 0.1)
80	conserved hypothetical protein	Streptococcus pneumoniae TIGR4
82	hypothetical protein	Catenibacterium mitsuokai DSM 15897
85	COG0395: ABC-type sugar transport system, permease component	Clostridiales genomosp. BVAB3 str. UPII9-5
88	hypothetical protein	No hit (e < 0.1)
89	hypothetical protein	No hit (e < 0.1)
90	PTS system, cellobiose-specific IIC component	Clostridium butyricum E4 str. BoNT E BL5262
91	conserved hypothetical protein	Streptococcus suis 05ZYH33
93	possible UDP-glucose--hexose-1-phosphate uridylyltransferase	Ajellomyces dermatitidis SLH14081
94	exonuclease	Parascardovia denticolens F0305
95	glutaredoxin	Scardovia inopinata F0304
108	Polyphosphate kinase	Actinomyces odontolyticus F0309
109	hypothetical protein	Coprococcus comes ATCC 27758
113	hypothetical protein	No hit (e < 0.1)
117	Cell surface protein	Lactobacillus iners DSM 13335
118	hypothetical protein	No hit (e < 0.1)
122	RecA protein	Rothia mucilaginosa DY-18
127	FtsK/SpoIIIE-family protein	Clostridiales genomosp. BVAB3 str. UPII9-5
135	hypothetical protein	Desulfurococcus kamchatkensis 1221n
140	LPXTG-motif cell wall anchor domain protein	No hit (e < 0.1)
141	conserved hypothetical protein	Peptoniphilus lacrimalis 315-B
143	cytoplasmic protein	Corynebacterium glucuronolyticum ATCC 51866
144	inner membrane protein	Providencia stuartii ATCC 25827
145	choloylglycine hydrolase	Erysipelothrix rhusiopathiae ATCC 19414
146	hypothetical protein	No hit (e < 0.1)
148	hypothetical protein	No hit (e < 0.1)
151	hypothetical protein	No hit (e < 0.1)
152	hypothetical protein	Corynebacterium matruchotii ATCC 33806
153	hypothetical protein	Corynebacterium matruchotii ATCC 33806
156	hypothetical protein	No hit (e < 0.1)
157	hypothetical protein	Roseburia intestinalis L1-82
160	hypothetical protein	No hit (e < 0.1)
161	sensor histidine kinase/response regulator	Clostridiales genomosp. BVAB3 str. UPII9-5
164	Lantibiotic resistance ABC transporter, permease	Clostridiales genomosp. BVAB3 str. UPII9-5
165	Lantibiotic resistance ABC transporter, permease	Clostridiales genomosp. BVAB3 str. UPII9-5
166	hypothetical protein	No hit (e < 0.1)
167	hypothetical protein	Clostridiales genomosp. BVAB3 str. UPII9-5
175	hypothetical protein	Atopobium vaginae DSM 15829
176	hypothetical protein	No hit (e < 0.1)
178	hypothetical protein	No hit (e < 0.1)
180	hypothetical protein	No hit (e < 0.1)
194	hypothetical protein	No hit (e < 0.1)
207	hypothetical protein	Clostridium scindens ATCC 35704
225	hypothetical protein	No hit (e < 0.1)
233	periplasmic binding protein and sugar binding domain of the LacI-family protein	Roseiflexus sp. RS-1
244	hypothetical protein	No hit (e < 0.1)
245	hypothetical protein	No hit (e < 0.1)
250	hypothetical protein	No hit (e < 0.1)
255	hypothetical protein	No hit (e < 0.1)
259	hypothetical protein	Ruminococcus lactaris ATCC 29176
260	conserved hypothetical protein	Oribacterium sp. oral taxon 078 str. F0262
267	conserved hypothetical protein	Atopobium vaginae DSM 15829
274	kinase domain protein	Parascardovia denticolens F0305
285	hypothetical protein	No hit (e < 0.1)
287	hypothetical protein	No hit (e < 0.1)
292	hypothetical protein	No hit (e < 0.1)
293	LPXTG-motif cell wall anchor domain protein	Atopobium vaginae DSM 15829
294	hypothetical protein	No hit (e < 0.1)
295	glycine oxidase ThiO	Corynebacterium kroppenstedtii DSM 44385
296	thiamine biosynthesis protein ThiS	Streptomyces viridochromogenes DSM 40736
298	hypothetical protein	Human cosavirus B
306	hypothetical protein	No hit (e < 0.1)
311	hypothetical protein	No hit (e < 0.1)
339	hypothetical protein	No hit (e < 0.1)
347	hypothetical protein	Chthoniobacter flavus Ellin428
348	conserved hypothetical protein	Parascardovia denticolens F0305
349	hypothetical protein	No hit (e < 0.1)
350	hypothetical protein	No hit (e < 0.1)
364	hypothetical protein	No hit (e < 0.1)
367	nitroreductase-family protein	Arcanobacterium haemolyticum DSM 20595
370	hypothetical protein	No hit (e < 0.1)
423	glycoside hydrolase family 31	Nakamurella multipartita DSM 44233
427	GA module protein	Lactobacillus jensenii SJ-7A-US
428	hypothetical protein	No hit (e < 0.1)
431	hypothetical protein	Prevotella oris C735
432	conserved hypothetical protein	Streptococcus equi subsp. equi 4047
437	hypothetical protein	No hit (e < 0.1)
442	hypothetical protein	No hit (e < 0.1)
462	hypothetical protein	Collinsella aerofaciens ATCC 25986
463	PA domain protein	Arcanobacterium haemolyticum DSM 20595
464	Serine proteinase	Brachybacterium faecium DSM 4810
494	conserved hypothetical protein	Roseburia intestinalis L1-82
496	hypothetical protein	Eubacterium saphenum ATCC 49989
515	hypothetical protein	No hit (e < 0.1)
533	polysaccharide ABC superfamily ATP binding cassette transporter, membrane protein	Arthrobacter aurescens TC1
540	family 2 glycosyl transferase	Streptococcus infantarius subsp. infantarius ATCC BAA-102
568	alkyl hydroperoxide reductase, F subunit	Mobiluncus mulieris 28-1
590	hypothetical protein	No hit (e < 0.1)
591	hypothetical protein	Clostridiales genomosp. BVAB3 str. UPII9-5
592	transcriptional regulator, XRE family	Clostridiales genomosp. BVAB3 str. UPII9-5
593	DNA recombinase, putative	Clostridium scindens ATCC 35704
594	conserved hypothetical protein	Parvimonas micra ATCC 33270
595	hydrolase	Clostridium difficile QCD-66c26
596	AcrR family transcriptional regulator	Clostridium acetobutylicum ATCC 824
598	conserved hypothetical protein	Shuttleworthia satelles DSM 14600
599	hypothetical protein	Atopobium vaginae DSM 15829
601	hypothetical protein	Parvimonas micra ATCC 33270
602	Cadmium resistance protein	Lactobacillus iners DSM 13335
604	transcriptional regulator	Streptococcus equi subsp. zooepidemicus
605	conserved hypothetical protein	Fusobacterium sp. 3_1_33
606	hydrolase, NUDIX family	Lactobacillus iners DSM 13335
607	hypothetical protein	Peptostreptococcus anaerobius 653-L
609	PHD-family TA system antitoxin	Oribacterium sinus F0268
611	hypothetical protein	Anaerococcus prevotii DSM 20548
612	conserved hypothetical protein	Lactobacillus iners DSM 13335
613	hypothetical protein	Lactobacillus iners DSM 13335
615	membrane protein	No hit (e < 0.1)
616	hypothetical protein	No hit (e < 0.1)
617	hypothetical protein	Clostridiales genomosp. BVAB3 str. UPII9-5
618	hypothetical protein	Treponema vincentii ATCC 35580
619	hypothetical protein	Lactobacillus iners DSM 13335
620	hypothetical protein	Rothia mucilaginosa ATCC 25296
621	conserved hypothetical protein	Clostridiales genomosp. BVAB3 str. UPII9-5
622	1,4-dihydroxy-2-naphthoate octaprenyltransferase	Parascardovia denticolens F0305
632	hypothetical protein	No hit (e < 0.1)
685	Family 1 glycosyltransferase	Clostridium methylpentosum DSM 5476
695	hypothetical protein	No hit (e < 0.1)
696	membrane protein	Atopobium vaginae DSM 15829
697	conserved hypothetical protein	Atopobium vaginae DSM 15829
707	putative cell surface protein precursor SprD	Atopobium vaginae DSM 15829
708	hypothetical protein	No hit (e < 0.1)
709	mevalonate kinase	Granulicatella elegans ATCC 700633
710	diphosphomevalonate decarboxylase	Streptococcus suis 89/1591
711	isopentenyl-diphosphate delta-isomerase, type 2	Lactobacillus sakei subsp. sakei 23K
714	kinase, PfkB-family	Lactobacillus brevis subsp. gravesensis ATCC 27305
729	hypothetical protein	No hit (e < 0.1)
745	hypothetical protein	No hit (e < 0.1)
746	hypothetical protein	No hit (e < 0.1)
747	hypothetical protein	No hit (e < 0.1)
748	hypothetical protein	No hit (e < 0.1)
749	Type-I fimbrial major subunit precursor	Corynebacterium striatum ATCC 6940
751	hypothetical protein	No hit (e < 0.1)
753	hypothetical protein	No hit (e < 0.1)
755	hydroxymethylglutaryl-CoA synthase	Lactobacillus casei ATCC 334
756	hydroxymethylglutaryl-CoA reductase, degradative	Parascardovia denticolens F0305
757	acetyl-CoA C-acetyltransferase	Parascardovia denticolens F0305
759	hypothetical protein	No hit (e < 0.1)
773	hypothetical protein	No hit (e < 0.1)
778	CRISPR system CASCADE complex protein CasE	Atopobium vaginae DSM 15829
781	CRISPR system CASCADE complex protein CasB	Atopobium vaginae DSM 15829
782	CRISPR system CASCADE complex protein CasA	Atopobium vaginae DSM 15829
784	hypothetical protein	No hit (e < 0.1)
785	hypothetical protein	No hit (e < 0.1)
786	hypothetical protein	No hit (e < 0.1)
791	transporter, major facilitator-family protein	Streptomyces sp. SPB78
792	hypothetical protein	Ruminococcus obeum ATCC 29174
798	hypothetical protein	Proteus mirabilis ATCC 29906
799	hypothetical protein	Rhodococcus erythropolis PR4
808	hypothetical protein	Flavobacteria bacterium MS024-3C
813	conserved hypothetical protein	Bacteroides capillosus ATCC 29799
834	MFS family major facilitator transporter	Bacillus subtilis subsp. spizizenii ATCC 6633
835	hypothetical protein	Leptothrix cholodnii SP-6
836	hypothetical protein	Wolinella succinogenes DSM 1740
843	hypothetical protein	No hit (e < 0.1)
844	hypothetical protein	No hit (e < 0.1)
845	cobalt transport protein	Leptotrichia buccalis DSM 1135
849	hypothetical protein	Roseburia intestinalis L1-82
850	ATPase	Atopobium vaginae DSM 15829
859	keratin associated protein 5-4	Laccaria bicolor S238N-H82
863	hypothetical protein	No hit (e < 0.1)
864	hypothetical protein	Collinsella aerofaciens ATCC 25986
868	LytTr DNA-binding domain protein	Eubacterium rectale ATCC 33656
878	serine acetyltransferase	Atopobium vaginae DSM 15829
885	hypothetical protein	Atopobium vaginae DSM 15829
898	hypothetical protein	Corynebacterium glucuronolyticum ATCC 51866
914	hypothetical protein	No hit (e < 0.1)
915	hypothetical protein	No hit (e < 0.1)
917	membrane protein	Atopobium parvulum DSM 20469
919	hypothetical protein	No hit (e < 0.1)
923	hypothetical protein	No hit (e < 0.1)
925	hypothetical protein	Clostridium sporogenes ATCC 15579
930	hypothetical protein	No hit (e < 0.1)
935	hypothetical protein	No hit (e < 0.1)
937	hypothetical protein	Chlorobium chlorochromatii CaD3
949	membrane protein	Scardovia inopinata F0304
950	membrane protein	No hit (e < 0.1)
952	hypothetical protein	No hit (e < 0.1)
954	methicillin resistance protein	Mobiluncus mulieris 28-1
967	hypothetical protein	No hit (e < 0.1)
968	hypothetical protein	No hit (e < 0.1)
982	HicB-family TA system antitoxin	Lactobacillus delbrueckii subsp. bulgaricus ATCC 11842
983	Pyrrolidone-carboxylate peptidase	Thermoanaerobacter tengcongensis MB4
986	TENA/THI-4 protein	Rothia mucilaginosa ATCC 25296
987	YhgE/Pip C-terminal domain protein	Thermoanaerobacter mathranii subsp. mathranii str. A3
988	hypothetical protein	Eggerthella lenta DSM 2243
989	2-keto-3-deoxygluconate permease (KDG permease	Granulicatella adiacens ATCC 49175
990	hypothetical protein	No hit (e < 0.1)
992	Vaginolysin	Streptococcus intermedius
997	conserved hypothetical protein	Atopobium vaginae DSM 15829
998	hypothetical protein	No hit (e < 0.1)
999	LPxTG-domain protein	Atopobium vaginae DSM 15829
1000	hypothetical protein	No hit (e < 0.1)
1001	hypothetical protein	Corynebacterium jeikeium ATCC 43734
1006	hypothetical protein	No hit (e < 0.1)
1009	hypothetical protein	No hit (e < 0.1)
1010	hypothetical protein	No hit (e < 0.1)
1014	ABC 3 transport-family protein	Corynebacterium diphtheriae NCTC 13129
1015	ABC 3 transport-family protein	Corynebacterium diphtheriae NCTC 13129
1017	periplasmic solute binding-family protein	Actinomyces odontolyticus F0309
1022	hypothetical protein	No hit (e < 0.1)
1023	autotransporter, putative	Atopobium vaginae DSM 15829
1024	conserved hypothetical protein	Ruminococcus sp. 5_1_39B_FAA
1025	conserved hypothetical protein	Ruminococcus sp. 5_1_39B_FAA
1026	hypothetical protein	No hit (e < 0.1)
1027	hypothetical protein	Clostridiales genomosp. BVAB3 str. UPII9-5
1028	prophage ps3 protein 1	Desulfotomaculum acetoxidans DSM 771
1029	hypothetical protein	Desulfotomaculum acetoxidans DSM 771
1034	hypothetical protein	Pediculus humanus corporis
1046	hypothetical protein	No hit (e < 0.1)
1066	hypothetical protein	No hit (e < 0.1)
1077	hypothetical protein	Corynebacterium glutamicum R
1079	aminoglycoside phosphotransferase	Actinomyces odontolyticus F0309
1080	ABC transporter substrate-binding protein	Actinomyces odontolyticus F0309
1081	hypothetical protein	No hit (e < 0.1)
1085	Sortase A, LPXTG specific	Mobiluncus curtisii ATCC 43063
1088	kojibiose phosphorylase	Coprococcus comes ATCC 27758
1090	beta-phosphoglucomutase	Coprococcus comes ATCC 27758
1091	Evolved beta-D-galactosidase, alpha subunit	Actinomyces urogenitalis DSM 15434
1092	cryptic beta-D-galactosidase subunit beta	Shigella boydii CDC 3083-94
1101	conserved hypothetical protein	Lactobacillus ultunensis DSM 16047
1102	possible surface anchor protein	Atopobium vaginae DSM 15829
1103	hypothetical protein	Atopobium vaginae DSM 15829
1106	hypothetical protein	No hit (e < 0.1)
1121	Type-II fimbrial major subunit precursor	Actinomyces naeslundii
1123	hypothetical protein	No hit (e < 0.1)
1124	hypothetical protein	No hit (e < 0.1)
1126	hypothetical protein	No hit (e < 0.1)
1127	hypothetical protein	No hit (e < 0.1)
1135	possible alpha-L-fucosidase	Actinomyces odontolyticus F0309
1170	hypothetical protein	No hit (e < 0.1)
1174	hypothetical protein	No hit (e < 0.1)
1180	hypothetical protein	No hit (e < 0.1)
1184	LPxTG-domain protein	Rhizobium leguminosarum bv. viciae 3841
1185	membrane protein	Atopobium vaginae DSM 15829
1188	hypothetical protein	Pseudomonas phage LUZ7
1189	possible multidrug efflux protein	Corynebacterium matruchotii ATCC 14266
1201	hypothetical protein	Clostridiales genomosp. BVAB3 str. UPII9-5
1213	hypothetical protein	Lactobacillus ruminis ATCC 25644
1217	anchored repeat-type ABC transporter, permease subunit	Micromonospora sp. ATCC 39149
1219	anchored repeat ABC transporter, substrate-binding protein	Actinomyces coleocanis DSM 15436
1220	hypothetical protein	No hit (e < 0.1)
1221	actinobacterial surface-anchored protein domain protein	Rothia mucilaginosa ATCC 25296
1222	actinobacterial surface-anchored protein domain protein	Arcanobacterium haemolyticum DSM 20595
1223	isochorismatase	Atopobium vaginae DSM 15829
1240	hypothetical protein	No hit (e < 0.1)
1244	hypothetical protein	No hit (e < 0.1)
1245	hypothetical protein	No hit (e < 0.1)
1248	hypothetical protein	No hit (e < 0.1)
1250	hypothetical protein	No hit (e < 0.1)
1252	hypothetical protein	No hit (e < 0.1)
1254	lipoprotein	No hit (e < 0.1)
1262	Na+/H+ antiporter-family protein	Atopobium vaginae DSM 15829
1263	conserved hypothetical protein	Flavobacteriales bacterium ALC-1
1264	LemA-family protein	Anaerococcus tetradius ATCC 35098
1265	hypothetical protein	Finegoldia magna ATCC 53516
1266	Substrate-specific component STY3230 of queuosine-regulated ECF transporter	Atopobium vaginae DSM 15829
1267	cobalt ABC transporter permease protein	Atopobium vaginae DSM 15829
1270	ABC transporter, ATP-binding protein	Clostridiales genomosp. BVAB3 str. UPII9-5
1271	hypothetical protein	Anaerococcus tetradius ATCC 35098
1277	hypothetical protein	No hit (e < 0.1)
1279	hypothetical protein	Anaerococcus lactolyticus ATCC 51172
1280	hypothetical protein	No hit (e < 0.1)
1282	hypothetical protein	Lactobacillus brevis ATCC 367
1283	hypothetical protein	Mobiluncus mulieris ATCC 35243
1284	hypothetical protein	Alcanivorax borkumensis SK2
1285	conserved hypothetical protein	Parascardovia denticolens F0305
