# Supplementary material for: Comparative Genomics of Gardnerella vaginalis Strains Reveals Substantial Differences in Metabolic and Virulence Potential
Source: PLoS One. 2010 Aug 26;5(8):e12411. doi: 10.1371/journal.pone.0012411 (PMC2928729; doi:10.1371/journal.pone.0012411)
Supplement: Table S10 — Potential FUR-regulatory sequences. All identified FUR-box sequences identified within each G. vaginalis strain along with proximal downstream genes, which may be regulated by the FUR-family transcriptional regulator. (0.08 MB PDF) [file pone.0012411.s014.pdf]

**Table S10      Potential Fur-regulatory sequences**

| 3' - Proximal gene            |                                                 | Fur-box<br>sequence  | Identities |
|-------------------------------|-------------------------------------------------|----------------------|------------|
| Locus Tag                     | Product                                         |                      |            |
| 409-05                        |                                                 |                      |            |
| HMPREF0421_0142 <sup>3</sup>  | ATP synthase F0, subunit A                      | CGTAATCGTTATGATTATT  | 12/19      |
| HMPREF0424_1188               | Phosphotransferase-family protein               | ACTAATAATAATTATTTT   | 13/19      |
| HMPREF0424_1233               | D-ala D-ala ligase-like protein                 | AATAATTAGAATAATTCAA  | 12/19      |
| HMPREF0424_1241               | Actinobacterial surface-anchored protein        | ATTAATGAGAATCATTATT  | 15/19      |
| Unclear <sup>1</sup>          | Unclear                                         | AATTATGAGAATAATTTTC  | 13/19      |
| Unclear <sup>1</sup>          | Unclear                                         | CCTAATGGGAATAATTGCC  | 12/19      |
| Unclear <sup>1</sup>          | Unclear                                         | CGTAATCGTTATTATTTGA  | 10/19      |
| Unclear <sup>1</sup>          | Unclear                                         | GTTAATGAGAATCATTATC  | 17/19      |
| Unclear <sup>1</sup>          | Unclear                                         | TTTTATTAGAATAATTACT  | 11/19      |
| Unclear <sup>1,4</sup>        | Unclear                                         | AATAATAATAATGATTCTC  | 15/19      |
| 317                           |                                                 |                      |            |
| HMPREF0421_20009 <sup>3</sup> | ATP synthase F0, subunit A                      | CGTAATCGTTATGATTATT  | 12/19      |
| HMPREF0421_20303              | Actinobacterial surface-anchored protein        | ATTAATGAGAATCATTATT  | 15/19      |
| HMPREF0421_20307              | Hypothetical protein                            | GTTTATGAGAATGATTCTC  | 14/19      |
| HMPREF0421_20603 <sup>3</sup> | Kinase                                          | TTTAATAAGAATGATTTAA  | 11/19      |
| HMPREF0421_20711 <sup>3</sup> | ABC transporter, permease protein               | AGTAATAGTAATGATTTTT  | 12/19      |
| HMPREF0421_20763 <sup>3</sup> | Conserved hypothetical protein                  | AATTATAAGAATAATTGCA  | 11/19      |
| HMPREF0421_20840              | Peroxiredoxin                                   | CTTAATGATAATAATTATC  | 16/19      |
| HMPREF0421_20841              | Alcohol dehydrogenase                           | GATAATTATTATCATTAAAG | 15/19      |
| HMPREF0421_20864 <sup>3</sup> | Glutamate-5-semialdehyde dehydrogenase          | CGTAATGGGAATTATTAC   | 12/19      |
| HMPREF0421_20879              | Conserved hypothetical protein                  | TTTTATCATTATAATTGAT  | 10/19      |
| HMPREF0421_21091              | Conserved hypothetical protein                  | GATTATAAGAATGATTGCA  | 12/19      |
| HMPREF0421_21130 <sup>3</sup> | Site-specific tyrosine recombinase, <i>xerC</i> | CGTAATAATAATGATTTAT  | 12/19      |
| HMPREF0421_21326              | Glucose-6-phosphate dehydrogenase               | CGTAATAGTTATTATTGCA  | 10/19      |
| HMPREF0421_21337              | ATPase                                          | TATTATAATTATGATTATA  | 13/19      |
| Unclear <sup>1</sup>          | Unclear                                         | CCTAATGGGAATAATTGCC  | 12/19      |
| Unclear <sup>1</sup>          | Unclear                                         | ACTAATTATAATAATTTCT  | 12/19      |
| Unclear <sup>1,2</sup>        | Unclear                                         | CATTATTAGAATAATTTGC  | 12/19      |
| Unclear <sup>1,2</sup>        | Unclear                                         | AATAATCGTAATTATTTAA  | 12/19      |
| Unclear <sup>1</sup>          | Unclear                                         | AGTTATAAGAATTATTACG  | 11/19      |
| Unclear <sup>1</sup>          | Unclear                                         | TTTTATAAGAATAATTAAA  | 11/19      |
| Unclear <sup>1</sup>          | Unclear                                         | TGTAATCATTATGATTTAC  | 12/19      |
| Unclear <sup>1</sup>          | Unclear                                         | AGTAATTATAATTATTTAA  | 12/19      |
| 594                           |                                                 |                      |            |
| 55                            | Methionine aminopeptidase                       | TATTATTATTATCATTGTT  | 13/19      |
| 127 <sup>3</sup>              | Ftsk/SpoIIIE-family protein                     | TGTAATGATTATTATTGCT  | 12/19      |
| 134 <sup>3</sup>              | Arylsulfatase                                   | AATAATGGTTATGATTGTG  | 13/19      |
| 544 <sup>3</sup>              | Glutamate-5-semialdehyde dehydrogenase          | CGTAATGGGAATTATTAC   | 12/19      |
| 566                           | Alcohol dehydrogenase                           | GATAATTATTATCATTAAAG | 15/19      |
| 567                           | Peroxiredoxin                                   | CTTAATGATAATAATTATC  | 16/19      |
| 733 <sup>3</sup>              | Site-specific tyrosine recombinase, <i>xerC</i> | CGTAATAATAATGATTTAT  | 12/19      |
| 772                           | Conserved hypothetical protein                  | GATTATAAGAATGATTGCA  | 12/19      |
| 939 <sup>3</sup>              | ATP synthase F0, subunit A                      | CGTAATCGTTATGATTATT  | 12/19      |
| 1057 <sup>3</sup>             | Kinase                                          | TTTAATAAGAATGATTTAA  | 11/19      |
| 1222                          | Actinobacterial surface-anchored protein        | ATTAATGAGAATCATTATT  | 15/19      |
| 1259 <sup>3</sup>             | ABC transporter, permease protein               | AGTAATAGTAATGATTTTT  | 12/19      |
| 1276                          | ATPase                                          | TATTATAATTATGATTATA  | 13/19      |
| Unclear <sup>1,4</sup>        | Unclear                                         | AATAATAATAATGATTCTC  | 15/19      |
| Unclear <sup>1</sup>          | Unclear                                         | AGTAATTATAATTATTTAA  | 12/19      |
| Unclear <sup>1</sup>          | Unclear                                         | TTTTATAAGAATAATTAAA  | 11/19      |
| Unclear <sup>1</sup>          | Unclear                                         | TGTAATCATTATGATTTAC  | 12/19      |
| Unclear <sup>1</sup>          | Unclear                                         | CATTATTAGAATAATTTGC  | 12/19      |
| Consensus sequence            |                                                 | GATAATGATAATCATTATC  |            |

<sup>1</sup> Fur-box located in region devoid of proximal gene candidates (within 1 kb) on same DNA strand. <sup>2</sup> A potential uncalled hypothetical gene is found downstream of Fur-box but overlaps larger ORF with functional assignment <sup>3</sup> Fur box located within gene sequence <sup>4</sup> Downstream of isochorismatase
